# Supplementary material for: Young adults’ perspectives on living with kidney failure: a systematic review and thematic synthesis of qualitative studies
Source: PubMed Central journal article supplement — BMJ Open. 2018 Jan 10;8(1):e019926. doi: 10.1136/bmjopen-2017-019926 (PMC5781019; doi:10.1136/bmjopen-2017-019926), 2018-01-10
Supplement: bmjopen-2017-019926.draft_revisions.pdf [file bmjopen-2017-019926.draft_revisions.pdf]

# BMJ Open

BMJ Open is committed to open peer review. As part of this commitment we make the peer review history of every article we publish publicly available.

When an article is published we post the peer reviewers' comments and the authors' responses online. We also post the versions of the paper that were used during peer review. These are the versions that the peer review comments apply to.

The versions of the paper that follow are the versions that were submitted during the peer review process. They are not the versions of record or the final published versions. They should not be cited or distributed as the published version of this manuscript.

BMJ Open is an open access journal and the full, final, typeset and author-corrected version of record of the manuscript is available on our site with no access controls, subscription charges or pay-per-view fees (<http://bmjopen.bmj.com>).

If you have any questions on BMJ Open's open peer review process please email [editorial.bmjopen@bmj.com](mailto:editorial.bmjopen@bmj.com)

# BMJ Open

## Young Adults' Perspectives on Living with Kidney Failure: a Systematic Review and Thematic Synthesis of Qualitative Studies

|                                 |                                                                                                                                                                                                                                                                                                                                               |
|---------------------------------|-----------------------------------------------------------------------------------------------------------------------------------------------------------------------------------------------------------------------------------------------------------------------------------------------------------------------------------------------|
| Journal:                        | <i>BMJ Open</i>                                                                                                                                                                                                                                                                                                                               |
| Manuscript ID                   | bmjopen-2017-019926                                                                                                                                                                                                                                                                                                                           |
| Article Type:                   | Research                                                                                                                                                                                                                                                                                                                                      |
| Date Submitted by the Author:   | 03-Oct-2017                                                                                                                                                                                                                                                                                                                                   |
| Complete List of Authors:       | Bailey, Philippa; University of Bristol, School of Social and Community Medicine; North Bristol NHS Trust, Hamilton, Alexander<br>Clissold, Rhian<br>Inward, Carol<br>Caskey, Fergus; University of Bristol<br>Ben-Shlomo, Yoav; University of Bristol,<br>Owen-Smith, Amanda; University of Bristol, School of Social and Community Medicine |
| <b>Primary Subject Heading</b>: | Renal medicine                                                                                                                                                                                                                                                                                                                                |
| Secondary Subject Heading:      | Qualitative research                                                                                                                                                                                                                                                                                                                          |
| Keywords:                       | Psychosocial impact, QUALITATIVE RESEARCH, Renal Replacement Therapy, Thematic synthesis, Young adults                                                                                                                                                                                                                                        |
|                                 |                                                                                                                                                                                                                                                                                                                                               |

SCHOLARONE™  
Manuscripts

1  
2  
3  
4 Young Adults' Perspectives on Living with Kidney Failure: a Systematic Review and  
5  
6 Thematic Synthesis of Qualitative Studies  
7  
8  
9

10 Pippa K Bailey BA BM BCh MRCP DTM&H PhD <sup>1,2,3</sup>

11  
12  
13 Alexander J Hamilton BSc MBBS, MRCP <sup>1,4</sup>

14  
15  
16 Rhian L Clissold BSc MB ChB MRCP <sup>5</sup>

17  
18  
19 Carol D Inward MB BCh MD FRCPCH <sup>6</sup>

20  
21  
22 Fergus J Caskey MB ChB MSc MD FRCP <sup>1,3,4</sup>

23  
24  
25 Yoav Ben-Shlomo MB BS MSc PhD MRCP <sup>1</sup>

26  
27  
28 Amanda Owen-Smith MSc PhD <sup>1</sup>

29  
30 <sup>1</sup>Bristol Medical School: Population Health Sciences, Canynge Hall, Bristol, BS8 2PS, UK

31  
32 <sup>2</sup>Bristol Medical School: Translational Health Sciences, 69 St Michaels's Hill, Bristol, BS2  
33 8DZ, UK

34  
35  
36 <sup>3</sup>The Richard Bright Renal Unit, Southmead Hospital, North Bristol NHS Trust, Bristol,  
37 BS10 5NB, UK

38  
39  
40 <sup>4</sup>UK Renal Registry, Learning and Research Building, Southmead Hospital, Bristol, BS10  
41 5NB, UK

42  
43  
44 <sup>5</sup>Institute of Biomedical and Clinical Science, University of Exeter Medical School, Exeter,  
45 UK

46  
47  
48 <sup>6</sup>Bristol Royal Hospital for Children, 24 Upper Maudlin St, Bristol BS2 8BJ, UK

49  
50  
51 CORRESPONDING AUTHOR

52  
53 Dr Pippa K Bailey, G.13, Canynge Hall, 39 Whatley Road, Bristol, BS8 2PS, UK.

54  
55 [pippa.bailey@bristol.ac.uk](mailto:pippa.bailey@bristol.ac.uk)

1  
2  
3 **Keywords**

4 Psychosocial impact; Qualitative research; Renal Replacement Therapy; Thematic synthesis;  
5  
6 Young adults.  
7  
8  
9

10 **Word count**

11  
12 3989 words  
13  
14  
15  
16  
17  
18  
19  
20  
21  
22  
23  
24  
25  
26  
27  
28  
29  
30  
31  
32  
33  
34  
35  
36  
37  
38  
39  
40  
41  
42  
43  
44  
45  
46  
47  
48  
49  
50  
51  
52  
53  
54  
55  
56  
57  
58  
59  
60

For peer review only

## Abstract

### Objectives

Young adults fare worse than younger adolescents or older adults on a broad range of health indicators. Those with a chronic illness such as renal failure are a particularly vulnerable group: young adults with a transplant have an increased risk of graft failure compared to both children and older adults. Understanding how being in receipt of renal replacement therapy (RRT) affects the lives of young adults might help us to better prepare and support these individuals for and on RRT, and improve outcomes. This study aimed to synthesize research describing young adults' experiences of the psychosocial impact of kidney failure and RRT.

### Design

A systematic literature review identified qualitative research reporting the perspectives of 16-30 year olds receiving RRT on the psychosocial impact of renal failure. Electronic databases were searched to August 2016 for full-text papers. The transparency of reporting of each study was assessed using the Consolidated Criteria for Reporting Qualitative Health Research (COREQ) framework. An inductive thematic synthesis was undertaken.

### Participants

7 studies from 5 different countries were included, comprising 123 young adults receiving RRT.

### Results

Comprehensiveness of reporting was variable: studies reported 9 to 22 of the 32 COREQ-checklist items.

1  
2  
3 Three global themes about the impact of kidney failure on young adults were identified: 1)  
4 Difference desiring normality; 2) Thwarted or moderated dreams and ambitions; 3)  
5  
6  
7 Uncertainty and liminality. These reflected five organising themes: i) Physical appearance  
8  
9 and body image; ii) Activity and participation; iii) Educational disruption and  
10  
11 underachievement; iv) Career ambitions and employment difficulties; and v) Social isolation  
12  
13 and intimate relationships.  
14

## 15 16 **Conclusions**

17  
18  
19 Across different countries and different healthcare settings, young adults on RRT experience  
20  
21 difference and liminality, even after transplantation. Tailored social and psychological  
22  
23 support is required to allow young adults to experience wellness whilst in receipt of RRT, and  
24  
25 not have life on hold.  
26  
27  
28  
29  
30

## 31 **Strengths and limitations of this study**

- 32  
33  
34
- 35 • This is the first attempt to synthesise the existing qualitative literature that investigates  
36 the impact of renal failure on young adults.
  - 37 • The number of participants included was large and multinational.
  - 38 • The emergent themes were represented across the included studies, supporting the  
39 validity of the findings.
  - 40 • The quality of the included studies was variable, and the quality of the research  
41 undertaken was sometimes difficult to assess due to the poor standard of reporting.
  - 42 • Mental health appeared to be an under-investigated area.
- 43  
44  
45  
46  
47  
48  
49  
50  
51  
52  
53  
54  
55  
56  
57  
58  
59  
60

## Introduction

Young adults fare worse than younger adolescents or older adults on a broad range of health indicators [1-3]. Those with a chronic illness such as renal failure are a particularly vulnerable group [4]. Most young adults on RRT have a kidney transplant: in the UK 73% of 18-24 year olds on RRT have a functioning transplant [5]. Young adults with a transplant have an increased risk of transplant graft failure compared to both children and older adults [6, 7]. Understanding how renal failure affects the mental health, education, career ambitions, social lives and relationships of young adults might help us to better prepare and support these individuals for and on RRT, and improve outcomes.

Qualitative research can provide valuable insight into the impact of disease on an individual's life and lived experience, but single qualitative studies are often from one geographical area or healthcare centre, and often focus on a single aspect of experience rather than a spectrum. Thematic syntheses combine the findings from individual studies, to generate a rich, holistic, more complete understanding of the phenomena being investigated [8], and generate new findings.

This qualitative study aimed to describe how kidney failure impacts on the lives of young adults, to identify areas which might require research and clinical attention, to ultimately improve patient outcomes. A systematic review and meta-analysis of the quantitative research on the psychosocial impact of RRT on young adults was undertaken alongside this qualitative synthesis [9]. This thematic synthesis might help us to explain the quantitative findings, adding the patient voice and rich context to numerical results [10].

## Methods

We followed the Enhancing Transparency in Reporting the Synthesis of Qualitative Research (ENTREQ) framework [11].

## Search Strategy

A sensitive search strategy was applied to 9 databases (Medline, EMBASE, PsycINFO, ASSIA, CINAHL, Web of Science, Scopus, Open Grey, and Cochrane Library). Full search terms have been published [9]. We ran our first search in July 2015 and second in August 2016, for the latter limiting results to those from the last year only. We used Endnote™ to identify duplicate studies. AH screened the titles and abstracts of all the citations resulting from the search to identify studies fulfilling the inclusion criteria. RC screened a random sample of 1000 titles and abstracts to ensure consistency. Any disagreements were resolved by discussion.

## Study Selection

We included qualitative studies of young adults (aged 16-30 years) on RRT (dialysis and transplants) that explored participants' perspectives on and experiences of the impact of renal failure on their lives (including education, employment, social life, relationships, and psychological health). Studies were included if all or the majority (>50%) of participants were in this range. When studies included participants aged <16 or >30 years, quotes from those participants were excluded from analysis. There is no consensus definition for young adulthood, and we chose a priori a wider age-range to ensure we did not miss any important publications. Globally, the legal age at which individuals enter adulthood varies between 16 and 21, and there is generally a gradual transition to full adult status. All included qualitative articles were double-checked by PB to ensure they met the inclusion criteria. The references



1  
2  
3 of identified articles were screened to identify any additional papers. One study [12] analysed  
4 interviews with young people who had Chronic Kidney Disease (CKD) as well as individuals  
5 on dialysis. The lead author was contacted to request access to the original transcripts of  
6 those patients on dialysis, but the study's ethical approval did not allow transcripts to be  
7 shared. A decision was made to include this study, extracting the findings but excluding the  
8 quotes from individuals not on RRT. This decision was made as the paper was the highest  
9 quality study identified, the majority of the illustrative quotes were from individuals on  
10 dialysis (30/39 quotes presented in table), and the themes identified were deemed relevant to  
11 our study, and overlapped with findings from other included studies.  
12  
13  
14  
15  
16  
17  
18  
19  
20  
21  
22

23 We assessed the transparency of reporting of each study using the Consolidated Criteria for  
24 Reporting Qualitative Health Research (COREQ) framework [13]. PB assessed all seven  
25 studies. RC and AH independently assessed two papers and any differences were discussed as  
26 a group. No study with relevant data was excluded from the synthesis.  
27  
28  
29  
30  
31  
32  
33  
34

### 35 Thematic Synthesis

36  
37 Inductive thematic synthesis was undertaken with reference to the method outlined by  
38 Thomas and Harden [14]. The text in the results sections of each article was extracted  
39 electronically and entered verbatim into NVivo 10 qualitative software [15] for analysis. Data  
40 was analysed inductively. Line-by-line coding was undertaken, assigning sections of text  
41 descriptive labels. Codes were then grouped on the basis of shared properties to create  
42 concepts, which were grouped into themes. Subsequent studies were coded into pre-existing  
43 concepts, and new concepts were created when deemed necessary. Thus themes were  
44 identified and analytic induction used to identify any patterns arising. Relationships between  
45 themes were identified and explored. PB and AOS independently coded all the papers. PB  
46  
47  
48  
49  
50  
51  
52  
53  
54  
55  
56  
57  
58  
59  
60

1  
2  
3 and AOS discussed their findings and any coding discrepancies to maximise rigour and  
4  
5 reliability.  
6  
7

## 10 Results

11  
12 We included 7 studies (Figure 1), from 5 different countries, comprising 123 young adults  
13 receiving RRT. All studies were published in English; two were undertaken in countries in  
14 which English was not the primary language. All studies used in-depth semi-structured  
15 interviews to collect data, with some also using focus groups, diaries, and questionnaires  
16  
17 (Table 1).  
18  
19  
20  
21  
22

23  
24 Comprehensiveness of reporting was variable: studies reported between 9 and 22 of the 32  
25 COREQ-checklist items (Table 2). Only 4 studies reported that theoretical data saturation had  
26 been reached. One study reported that this had been reached after only interviewing 5  
27 participants [16] which is unexpected with such a small sample. Only one study was  
28 accompanied by an interview topic guide [12]. One paper presented the findings from a  
29 mixed-methods study, but details regarding the qualitative analysis were lacking [17]. Two  
30 studies suggested differences in the experiences of young adults who developed renal failure  
31 as children compared to those who were diagnosed as young adults [12, 18].  
32  
33  
34  
35  
36  
37  
38  
39  
40  
41  
42  
43  
44

## 45 Themes

46  
47 Three global themes about the psychosocial impact of renal failure on young adults were  
48 identified: 1) Difference desiring normality; 2) Thwarted or moderated dreams and  
49 ambitions; and 3) Uncertainty and liminality. These reflected five organising themes: i)  
50 Physical appearance and body image; ii) Activity and participation; iii) Educational  
51  
52  
53  
54  
55  
56  
57  
58  
59  
60

1  
2  
3 disruption and underachievement; iv) Career ambitions and employment difficulties; and v)  
4  
5 Social isolation and intimate relationships.

6  
7  
8 Results are now presented under the three global themes with reference to the organising  
9  
10 themes. Participant quotes illustrate themes.

### 11 12 13 14 15 *Difference desiring normality*

16  
17 Study participants reported that they felt different to their peers; difference appeared to be  
18  
19 perceived and reported as negative by all participants, who expressed strong desires to be  
20  
21 ‘normal’. Difference was primarily characterised by differences in physical appearance, and  
22  
23 by differences in ability to participate in activities. While young adults who had developed  
24  
25 renal disease in childhood reported desiring a perceived normality, young adults who  
26  
27 developed renal failure in young adulthood also described ‘an unbearable loss’ of a  
28  
29 previously experienced normality [12].  
30  
31

32  
33  
34 *“Going from living a normal life, from what I knew, to being in hospital*  
35  
36 *most of the time...I don’t like it.”(18,M,HD)[12] [Key: Age, Sex, RRT*  
37  
38 *(HD=haemodialysis; PD=peritoneal dialysis; Tx=transplant)]*

39  
40  
41 *“To look at me just like before, when I did not have the illness. Treat me*  
42  
43 *normally.” (18,M,HD)[19]*

### 44 45 *Physical appearance and body image*

46  
47 Participants across studies reported problems with being physically different to peers, due to  
48  
49 surgical interventions (e.g.peritoneal dialysis catheters), medication (e.g. weight gain), and  
50  
51 chronic illness (e.g. short stature).  
52  
53  
54  
55  
56  
57  
58  
59  
60

1  
2  
3 *"It can make you a bit like self-conscious if you have the tube. You worry*  
4 *that people can see it through your clothes or the scars..."(16,F,PD)[12]*  
5  
6

7  
8 These differences in physical appearance were often described using terminology suggesting  
9 a sense of dehumanisation and mechanisation, such as looking *"like a robot"* and feeling like  
10 a *"wood block."*[20]  
11  
12

13  
14 Many participants described finding that to some extent transplantation provided the physical  
15 normality they'd desired, resulting in:  
16  
17

18  
19  
20 *"[a] face without swelling,"* and *"no more being hairy"* [20]  
21

22 However, others experienced further physical changes following transplantation:  
23

24  
25 *"I'm covered in scars... my face is really fat... I just hate looking at myself,*  
26 *I think I look like a freak."*(28,F,Tx)[21]  
27  
28

29  
30 *"...prednisone [steroids] makes me eat a lot and gain weight..."*[16]  
31  
32

### 33 *Activity and participation*

34

35 As well as physical differences preventing individuals from feeling 'normal', study  
36 participants reported barriers to participating in everyday activities. Being able to participate  
37 in sport [21] and education were seen as particularly vital to being normal (Box 1).  
38  
39  
40  
41  
42  
43  
44  
45  
46  
47  
48  
49  
50  
51  
52  
53  
54  
55  
56  
57  
58  
59  
60

**Box 1: Activity and participation – Illustrative quotes**

*“While being on dialysis, I couldn’t soak in water. When I went to a water park after the transplant, it was quite wonderful as I didn’t need to attach a bandage to my body anymore, could get along with friends, and was not different from others.”(17,F,Tx)<sup>20</sup>*

*“The local education... wanted me to go to a special school, for people with learning difficulties... My Mum and Dad were like, ‘No, he hasn’t got a physical disability, it’s a medical condition, we want him to go to a normal school like all his friends and be treated normally.’”(27,M,HD)<sup>18</sup>*

Young adults tried to engage in the same activities as their peers, by denying their health problems, lying about hospital appointments, and missing medication when socialising (Box

**Box 2: Activity and participation – Denying, disguising or missing clinical treatment – Illustrative quotes**

*“I’d lie [about missing school for clinic]. I’d say I went to visit my girlfriend you know. You don’t say ‘I went to the hospital,’ ...It’s stupid. I just say I went to visit someone, or I didn’t feel like coming.”<sup>16</sup>*

*“I didn’t take (my tablets) on time, ever.... It was an embarrassment... I was going out with friends, they were drinking, smoking, doing things and there was me with a tablet box.”(26,F,Tx)<sup>21</sup>*

2).

A few participants described feeling a sense of normality when they had individually accepted their health problems, and had successfully developed an identity separate to their illness:

1  
2  
3            “[I started] to build more of an identity for myself that wasn't so centred on  
4  
5            my illness and it was more like...I do have an illness yet I still want to  
6  
7            establish that I'm a normal teenager like everyone else.”(19,M,HD)[12]  
8  
9

### 10 11 12 Thwarted or moderated dreams and ambitions

13  
14 Many participants described a sense of underachievement and lost opportunities, related to  
15  
16 education, employment, and intimate relationships.  
17  
18

### 19 20 21 22 *Educational disruption and underachievement*

23  
24 Young adults reported that renal failure negatively impacted on their educational  
25  
26 achievement whatever their educational level when starting RRT:  
27  
28

29            “Cos I'd started haemo... my [high school exam] results were really quite  
30  
31            bad... I was really, really upset... I went on to University... but I'd still not  
32  
33            done English and Maths.”(24,F,Tx)[18]  
34  
35

36  
37 Some participants directly attributed educational underachievement to their disease and  
38  
39 treatment, whilst others felt personally responsible, reporting that they had allowed their  
40  
41 illness to affect their achievements:  
42  
43

44            “When everyone was graduating year 12, I'm thinking oh, that could have  
45  
46            been me if I didn't let everything get in the way.”(18,F,HD)[12]  
47  
48

49 Many participants, despite feeling they had underachieved, had often still succeeded in  
50  
51 gaining significant qualifications:  
52  
53

54            “For the whole of my Finals year I was on dialysis. It was quite a struggle,  
55  
56            I would have got a 1st, but I got a 2(i).”(28,M,HD)[18]  
57  
58

### *Career ambitions and employment difficulties*

Participants moderated their career expectations with many reporting that they were able to find employment, but sometimes in jobs which were not what they'd hoped for:

*"I can get a job, like in a shop, but it doesn't really do much for me." (29, M, Tx) [18]*

One participant powerfully described his gradual realisation of the impact of renal failure on

#### **Box 3: Career ambitions and employment difficulties – Illustrative quote**

*Interview quote: "It's always been a military career for me and nothing else, and the thing is that this kidney puts that whole dream and that whole lifestyle at risk, like even if I get this [transplant], there's thousands of really strong men and nothing wrong with them at all that go for that and they don't get it, so you know like I have to work my arse off ten times harder and there's still no guarantee that I'm going to get it, and that's like the only career I've ever wanted, I can't think of myself doing anything else. I feel like that, this seems to have taken a lot of things away." (16, M, PD)<sup>12</sup>*

*Later journal entry: "Today we went to hospital for some transplant education. It involved a detailed description of the procedure and medication I would go through. I was feeling good about it when a sudden realization hit me. Since I would be on anti-rejection drugs to keep my immune system down so it would not attack the new kidney, I would be more likely to get disease and sick which makes a career in the army a not so likely future. I mean healthy normal men don't always get in and I'd be expected to fight in environments w[h]ere disease like dysentery and malaria are common. As if the fact that I've had renal failure didn't screw up my chances enough." (16, M, PD) (journal)<sup>12</sup>*

his career ambitions [12] (Box 3).

1  
2  
3 Disclosure of their renal disease to employers was perceived, and had been experienced by  
4  
5 some, as a challenge, the timing of which was thought to be crucial (Box 4).  
6  
7

8  
9 **Box 4: Employment and disclosure – Illustrative quotes**

10  
11 *“If you [kidney patient] put your CV in and you [employer] get a ‘normal’ CV in; ‘I  
12 can work full time, there’s nothing wrong with me.’ Well, who would you  
13 choose?”(Age not provided,F,Tx)<sup>17</sup>*

14  
15 *“My attitude... is to demonstrate... that I am more than capable of doing whatever  
16 it is that they want me to do. Once that has been established I tell them. I delay  
17 disclosure... that is the tactic.”(28,M,HD)<sup>18</sup>*  
18

19  
20  
21  
22 *Social isolation and intimate relationships*

23  
24 Participants described experiencing social isolation from peers as a result of their renal  
25  
26 disease. Sometimes this was associated with self-imposed isolation due to a dislike of their  
27  
28 physical appearance (see ‘Physical appearance and body image’):  
29

30  
31 *“(Transplantation) made me...huge basically...I didn’t go out for...about 3  
32 months... ‘cos I felt like everyone was looking at me.”(19,F,Tx)[21]*  
33  
34

35  
36 Some participants reported experiencing name-calling [16] and bullying by peers because of  
37  
38 their physical difference [20].  
39

40  
41 Sometimes social isolation resulted from feeling physically unwell or due to needing to  
42  
43 dialyse:  
44

45  
46 *“...you're so distanced from your friends, like they're off enjoying being  
47 eighteen, going to parties and everything, and I'm here stuck doing  
48 dialysis.” (18,F,HD)[12]*  
49  
50  
51  
52  
53  
54  
55  
56  
57  
58  
59



1  
2  
3 Renal failure was described by young adults as having a particularly significant impact on  
4 their confidence in pursuing, and ability to establish and maintain intimate relationships.  
5

6  
7 Young adults were concerned with finding a partner who would accept their need for RRT:  
8

9  
10 *“With my future, I'm mostly worried about relationships. Will I ever meet a*  
11 *guy who'll be there for me no matter what? Will he care if I'm still doing*  
12 *dialysis?”(18,F,HD)[12]*  
13  
14  
15

16  
17 Participants in several studies perceived rejection by a partner as being because of their renal  
18 disease [16, 21]. Some participants used the internet to find partners, and ‘avoided the kind of  
19 pain incurred by more ‘personal’ rejection’ [21].  
20  
21

22  
23 The themes of fertility and parenthood were key for older participants. There were multiple  
24 concerns, regarding fertility, heritable renal disease, the safety of pregnancy, and the impact  
25 of renal disease on the ability to be a long-living and active parent:  
26  
27  
28  
29

30  
31 *“We’d love kids... But, do you pass the problem on... then die half-way*  
32 *through as well?”(27,M,Tx)[21]*  
33  
34  
35  
36  
37  
38

### 39 **Uncertainty and liminality**

40  
41 The lives of the young adults appeared to be characterised by perpetual uncertainty.  
42

43 Participants across the studies expressed feelings suggestive of a sense of liminality related to  
44 their renal disease: that is, of experiencing periods of ‘middle ground’ or time spent ‘treading  
45 water’ before the final goal of receiving a transplant. During these liminal periods,  
46  
47 participants described putting life ‘on hold’:  
48  
49

50  
51  
52 One participant ‘cut his girlfriend off’ while on dialysis [21]. Others on dialysis decided to  
53 wait until they ‘got a transplant’ to seek a partner [21]:  
54  
55  
56  
57  
58  
59

1  
2  
3           “(I thought) I’m just going to... be on dialysis for a little while, have a  
4           transplant, then I can ‘move on’ (find a partner), because everything’s  
5           easier once you’ve had a transplant.”(28,M,Tx)[21]  
6  
7  
8  
9

10 Participants described ‘being shunted back and forth between wellness and illness, with  
11 intense periods of ill health, followed by variable periods of relative stability, sometimes  
12 lengthy, with a successful transplant.’[18] Young adults reported that periods of stability felt  
13 precarious and were often disrupted:  
14  
15  
16  
17

18  
19           “I had the dialysis problems at the wrong time...I’d just started (college) I  
20           thought I got them all sorted, then all re-occurred...so I had to stop the  
21           course.”(29,M,Tx)[18]  
22  
23  
24  
25

26 For most participants the liminal phase described time on dialysis before transplantation.  
27 However, the sense of finally having reached the ‘end goal’ of transplantation was often not  
28 sustained, as participants began to recognise that they were still different, and still had to  
29 manage restrictions in diet, medication, and activities [20].  
30  
31  
32  
33

34  
35 Uncertainty was felt regarding all aspects of their lives, not just physical health, and included  
36 concerns regarding future employment, relationships, and parenthood (see other organising  
37 themes).  
38  
39  
40  
41  
42  
43  
44  
45

## 46 Discussion

47  
48  
49

50 Young adults reported that renal failure impacted on their ambitions and life-goals, and their  
51 capacity and opportunities to achieve them. RRT impacted on their developing personal  
52 identity by affecting their education, career ambitions, employment capabilities, social  
53  
54  
55  
56  
57  
58  
59  
60

1  
2  
3 activities, and personal relationships. They described a sense of difference, and uncertainty,  
4  
5 both of which were intertwined with a sense of social isolation.  
6

7  
8 In qualitative syntheses of research with older adults [22, 23], participants have described  
9  
10 RRT affecting their personal identity, as well as impacting on existing relationships with  
11  
12 spouses/partners and children [22, 23]. This contrasts with our findings in young adults who  
13  
14 describe renal failure as impacting on the *development* of their identity, and their capacity to  
15  
16 form relationships, and gain employment. The concerns of younger adults specifically relate  
17  
18 to establishing key aspects of their lives, rather than managing the impact on an established  
19  
20 life.  
21

## 22 23 24 25 26 Liminality

27  
28 The concept of liminality, developed by anthropologist van Gennep in his work on rites of  
29  
30 passage [24], describes a state of ‘being inbetween’ pre and post ‘ritual’ states. Turner  
31  
32 described liminality as a space in which individuals are “neither one thing nor another; or  
33  
34 maybe both”[25], and a transitional intervening period between “two relatively fixed or stable  
35  
36 conditions”[25].  
37

38  
39 The emerging adults in this study were already in a liminal state, between childhood and  
40  
41 older/full adulthood. In addition, participants described being in a liminal state with respect to  
42  
43 their renal disease, which in many ways prolonged the liminal phase they were already  
44  
45 experiencing as a young adult as they put life ‘on hold’. Liminality was particularly  
46  
47 experienced on dialysis, while participants awaited transplantation. This has previously been  
48  
49 described in the renal literature [26, 27], including the experience of transplantation not  
50  
51 always delivering the desired/expected normality of wellness, and so in many ways  
52  
53 continuing the liminal state [26].  
54  
55  
56  
57  
58  
59  
60

## Convergence of qualitative and quantitative literature analyses

The quantitative systematic review and meta-analyses found that compared with healthy peers, young adults with transplants had lower quality of life [9]. Our thematic synthesis suggested this is due to the effects of transplant medications on appearance, and ongoing restrictions in diet, medication and activities. The poor quality of life is also likely to be explained by the persistent sense of liminality, and experience of transplantation as not the 'normal life' that was anticipated pre-transplantation.

This thematic synthesis found that young people had to moderate career expectations due to their disease, resulting in a mismatch between the jobs they wanted and those they were offered. Participants also reported difficulties disclosing their disease to employers, with a perceived impact on the likelihood of and security of employment. These findings may explain why the quantitative data found that young adults on RRT are more likely to be unemployed [9].

The quantitative data meta-analysis found that young adults on RRT were less likely to be married or have a partner [9]. The thematic synthesis suggested reasons for this, as young adults reported that their renal disease had an impact on their confidence in pursuing, and ability to establish and maintain intimate relationships. Young adults reported concerns finding a partner who would accept their need for RRT, and many reported rejection as a result of their renal failure. Concerns regarding fertility, heritable disease and parenthood were also reported as impacting on relationships.

### Clinical implications and future research

Psychosocial outcomes in patients on RRT have recently been identified by older adult patients as a priority for future research [28, 29]. At the moment the research priorities of young adults are being investigated as part of the SONG-Kids priority setting work, which includes 'children aged up to 21 years'[30]. There is a need for specific research into the priorities of young adults.

Mental health appeared to have been under-investigated in the included qualitative studies: two studies reported that two young adults had reported feeling suicidal [12, 16] but this was not described further. Some participants described feelings of hopelessness [12], and body image concerns. Formal research into mental health problems in young adults with renal disease is required.

A number of clinical interventions could be considered to better support young adults on RRT, who have unique needs associated with the development of personal identity and achieving life aims. The development of young adult clinics (including individuals diagnosed in young adulthood as well as those transitioning from paediatric care) may allow support to be tailored to these needs. The inclusion of social workers, citizens advice volunteers, youth workers, and psychologists in clinic, alongside CV-writing/interview skills workshops, and an area for socialising, has been modelled in a UK centre [31]. This model may be suitable for larger centres but a greater understanding is also needed of optimal models for smaller centres; providing this multi-disciplinary support across conditions/disciplines for young adults with chronic illness could be considered.

Help with managing expectations of transplantation, and support to not put life 'on hold' while waiting is important. Young people need to be prepared for the reality of transplantation, which includes expectations of improved health, but with an ongoing

1  
2  
3 treatment ‘burden’, possible complications and medication side-effects. A mindfulness-based  
4  
5 intervention has been reported as a possible way of helping people with chronic disease to  
6  
7 ‘experience wellness within illness’ [32].  
8  
9

10 Social media, online resources and dating apps can support the development of social  
11  
12 networks, especially for those with visible signs of RRT/body image issues who want to  
13  
14 establish a relationship before meeting in person. Online communities have been found to be  
15  
16 helpful in allowing young adults with cystic fibrosis to build an identity and sense of self, and  
17  
18 have been shown to help develop a social community and sociability that extends beyond  
19  
20 illness [33].  
21  
22  
23  
24  
25

### 26 Strengths and limitations

27  
28 To our knowledge this is the first attempt to synthesise the existing qualitative literature that  
29  
30 investigates the impact of renal failure on young adults. The systematic review and synthesis  
31  
32 were rigorous. Whilst the number of included studies was small, highlighting young adults as  
33  
34 an under-researched group, the number of participants included was large and multinational.  
35  
36 The emergent themes were represented across the included studies, supporting the validity of  
37  
38 the findings.  
39  
40  
41

42 There were a few limitations: i) The quality of the included studies was variable, and the  
43  
44 quality of the research undertaken was sometimes difficult to assess due to the poor standard  
45  
46 of reporting; ii) Only one study published an interview topic guide, important themes may not  
47  
48 have emerged due to limited questioning. iii) Only two of the included studies explicitly  
49  
50 reported the cultural or ethnic background of study participants [12, 17] and all studies were  
51  
52 from high-income countries except for one [19]. Findings may therefore not be transferable to  
53  
54 individuals from ethnic minority groups, or to different healthcare settings.  
55  
56  
57  
58  
59  
60

## Conclusions

This thematic synthesis enhances our understanding of the experiences of young adults with renal failure. These results will help clinical teams to better support young adult patients and better address their holistic and complex needs. Findings will also help research teams focus on areas of particular importance to young adults.

## Contributorship statement

Research idea and study design: AH, PB, AOS; data acquisition: AH; thematic synthesis: PB, AOS; Data interpretation: all; supervision or mentorship: AOS, YBS, FC, CI. Each author contributed important intellectual content during manuscript drafting or revision and accepts accountability for the overall work by ensuring that questions pertaining to the accuracy or integrity of any portion of the work are appropriately investigated and resolved. PB takes responsibility that this study has been reported honestly, accurately, and transparently; that no important aspects of the study have been omitted; and that any discrepancies from the study as planned (and, if relevant, registered) have been explained.

## Competing interests

None declared.

## Funding statement

PB holds a University of Bristol and Richard Bright Renal Unit, North Bristol NHS Trust funded Clinical Lectureship. AH is funded by the Tony Wing Fellowship from Kidney Care

1  
2  
3 UK (formerly the British Kidney Patient Association) and Kidney Research UK. Funders had  
4 no role in study design; collection, analysis, and interpretation of data; writing the report; or  
5 the decision to submit the report for publication.  
6  
7  
8  
9  
10  
11  
12

### 13 Data sharing statement

14  
15 No additional data available.  
16  
17

### 18 Acknowledgements

19  
20 This work has been accepted for oral presentation at the 18th Congress of the European  
21 Society for Organ Transplantation (ESOT) at Barcelona in September 2017.  
22  
23

24  
25 We would like to thank Penny Whiting for help in planning this review. We thank Dee  
26 Knipe, Mairead Murphy and Penny Whiting for their help with creating and managing a  
27 database for references. We acknowledge Catherine Borwick, specialist librarian, for  
28 assistance with the search strategy.  
29  
30  
31  
32  
33  
34  
35  
36  
37

### 38 References

- 39  
40  
41 1. Neinstein, L. and C.J. Irwin, *Young adults remain worse off than adolescents*. J Adolesc  
42 Health, 2013. **53**(5): p. 559-61.  
43 2. Park, M., et al., *The health status of young adults in the United States*. J Adolesc Health,  
44 2006. **39**(3): p. 305-17.  
45 3. Park, M., et al., *Adolescent and young adult health in the United States in the past decade:  
46 little improvement and young adults remain worse off than adolescents*. J Adolesc Health,  
47 2014. **55**(1): p. 3-16.  
48 4. Hamilton, A., et al., *The clinical epidemiology of young adults starting renal replacement  
49 therapy in the UK: presentation, management and survival using 15 years of UK Renal  
50 Registry data. [Epub ahead of print]*. Nephrol Dial Transplant, 2017.  
51 5. MacNeill, S.J., et al., *UK Renal Registry 18th Annual Report: Chapter 2 UK Renal Replacement  
52 Therapy Prevalence in 2014: National and Centre-specific Analyses*. Nephron, 2016. **132**  
53 **Suppl 1**: p. 41-68.  
54 6. Foster, B.J., *Heightened graft failure risk during emerging adulthood and transition to adult  
55 care*. Pediatr Nephrol, 2015. **30**(4): p. 567-76.  
56  
57  
58  
59  
60



- 1
  - 2
  - 3
  - 4
  - 5
  - 6
  - 7
  - 8
  - 9
  - 10
  - 11
  - 12
  - 13
  - 14
  - 15
  - 16
  - 17
  - 18
  - 19
  - 20
  - 21
  - 22
  - 23
  - 24
  - 25
  - 26
  - 27
  - 28
  - 29
  - 30
  - 31
  - 32
  - 33
  - 34
  - 35
  - 36
  - 37
  - 38
  - 39
  - 40
  - 41
  - 42
  - 43
  - 44
  - 45
  - 46
  - 47
  - 48
  - 49
  - 50
  - 51
  - 52
  - 53
  - 54
  - 55
  - 56
  - 57
  - 58
  - 59
  - 60
7. Van Arendonk, K.J., et al., *Age at graft loss after pediatric kidney transplantation: exploring the high-risk age window*. Clin J Am Soc Nephrol, 2013. **8**(6): p. 1019-26.
8. Paterson, B., et al., *Meta-Study of Qualitative Health Research: A Practical Guide to Meta-Analysis and Meta-Synthesis*. 2001, Thousand Oaks, CA: Sage Publications.
9. Hamilton, A., et al., *Socio-demographic, psychological health and lifestyle outcomes in young adults on renal replacement therapy*. Clin J Am Soc Nephrol, 2017(in press).
10. Tong, A. and J. Craig, *Tuning into Qualitative Research-A Channel for the Patient Voice*. Clin J Am Soc Nephrol, 2016. **11**(7): p. 1128-30.
11. Tong, A., et al., *Enhancing transparency in reporting the synthesis of qualitative research: ENTREQ*. BMC Med Res Methodol, 2012. **12**: p. 181.
12. Tong, A., et al., *Experiences and perspectives of adolescents and young adults with advanced CKD*. Am J Kidney Dis, 2013. **61**(3): p. 375-84.
13. Tong, A., P. Sainsbury, and J. Craig, *Consolidated criteria for reporting qualitative research (COREQ): a 32-item checklist for interviews and focus groups*. International Journal for Quality in Health Care, 2007. **19**(6): p. 349-57.
14. Thomas, J. and A. Harden, *Methods for the thematic synthesis of qualitative research in systematic reviews*. BMC Med Res Methodol, 2008. **8**(1): p. 45.
15. *NVivo qualitative data analysis Software; QSR International Pty Ltd. Version 10, 2012*.
16. Harwood, L. and B. Johnson, *Weighing risks and taking chances: adolescents' experiences of the regimen after renal transplantation*. ANNA, 1999. **26**(1): p. 17-21.
17. Murray, P., et al., *Impact of end-stage kidney disease on academic achievement and employment in young adults: a mixed methods study*. J Adolesc Health, 2014. **55**(4): p. 505-12.
18. Lewis, H. and S. Arber, *Impact of age at onset for children with renal failure on education and employment transitions*. Health, 2015. **19**(1): p. 67-85.
19. Cura, J., *Interpreting transition from adolescence to adulthood in patients on dialysis who have end-stage renal disease*. J Ren Care, 2012. **38**(3): p. 118-23.
20. Kim, S. and H. Choi, *Experiences of Korean adolescent renal transplant recipients*. J Spec Pediatr Nurs, 2016. **21**(3): p. 158-65.
21. Lewis, H. and S. Arber, *The role of the body in end-stage kidney disease in young adults: Gender, peer and intimate relationships*. Chronic Illn, 2015. **11**(3): p. 184-97.
22. Tong, A., et al., *The perspectives of adults living with peritoneal dialysis: thematic synthesis of qualitative studies*. Am J Kidney Dis, 2013. **61**(6): p. 873-88.
23. Reid, C., J. Seymour, and C. Jones, *A Thematic Synthesis of the Experiences of Adults Living with Hemodialysis*. Clin J Am Soc Nephrol, 2016. **11**(7): p. 1206-18.
24. van Gennep, A., *Les rites de passage (in French)*. 1909, Paris: Émile Nourry.
25. Turner, V., *The forest of symbols: Aspects of Ndembu ritual*. 1967, Ithaca, NY: Cornell University Press.
26. Crowley-Matoka, M., *Desperately seeking "normal": the promise and perils of living with kidney transplantation*. Soc Sci Med, 2005. **61**(4): p. 821-31.
27. Molzahn, A., A. Bruce, and L. Shields, *Learning from stories of people with chronic kidney disease*. Nephrol Nurs, 2008. **35**(1): p. 13-20.
28. Urquhart-Secord, R., et al., *Patient and Caregiver Priorities for Outcomes in Hemodialysis: An International Nominal Group Technique Study*. Am J Kidney Dis, 2016. **68**(3): p. 444-54.
29. Tong, A., et al., *Patients' priorities for health research: focus group study of patients with chronic kidney disease*. Nephrol Dial Transplant, 2008. **23**(10): p. 3206-14.
30. Tong, A., et al., *Standardised Outcomes in Nephrology-Children and Adolescents (SONG-Kids): a protocol for establishing a core outcome set for children with chronic kidney disease*. Trials, 2016. **17**(401).
31. Chrysochou, C., et al., *An innovative model for young adult renal care*. British Journal of Renal Medicine, 2016. **21**(3): p. 60-3.

- 1  
2  
3 32. Doran, N., *Experiencing Wellness Within Illness: Exploring a Mindfulness-Based Approach to*  
4 *Chronic Back Pain*. Qual Health Res, 2014. **24**(6): p. 749-60.  
5 33. Allen, C., et al., *Long-Term Condition Self-Management Support in Online Communities: A*  
6 *Meta-Synthesis of Qualitative Papers*. J Med Internet Res, 2016. **18**(3): p. e61.  
7  
8  
9  
10  
11  
12  
13  
14  
15  
16  
17  
18  
19  
20  
21  
22  
23  
24  
25  
26  
27  
28  
29  
30  
31  
32  
33  
34  
35  
36  
37  
38  
39  
40  
41  
42  
43  
44  
45  
46  
47  
48  
49  
50  
51  
52  
53  
54  
55  
56  
57  
58  
59  
60

1  
2  
3  
4  
5  
6  
7  
8  
9  
10  
11  
12  
13  
14  
15  
16  
17  
18  
19  
20  
21  
22  
23  
24  
25  
26  
27  
28  
29  
30  
31  
32  
33  
34  
35  
36  
37  
38  
39  
40  
41  
42  
43  
44  
45  
46  
47  
48  
49  
50  
51  
52  
53  
54  
55  
56  
57  
58  
59  
60

Figure legend

Figure 1. Systematic search results for studies

For peer review only

Table 1. Study characteristics

| Study ID                                 | Country         | No of participants                  | Age range (yrs)                | Methodological framework e.g. ethnography, phenomenology, qualitative | Data collection e.g. in-depth interviews, focus groups | Analysis e.g. content, framework, thematic, GT             | Topic                                                                                                                              |
|------------------------------------------|-----------------|-------------------------------------|--------------------------------|-----------------------------------------------------------------------|--------------------------------------------------------|------------------------------------------------------------|------------------------------------------------------------------------------------------------------------------------------------|
| <b>Peer-reviewed journal articles</b>    |                 |                                     |                                |                                                                       |                                                        |                                                            |                                                                                                                                    |
| <b>Tong, A (2013)[12]</b>                | Australia       | 27 in total – 14 receiving dialysis | 16 aged 12-17<br>11 aged 18-24 | Qualitative                                                           | In-depth interviews and journal entries                | Thematic analysis                                          | Experiences and Perspectives of Adolescents and Young Adults With Advanced Chronic Kidney Disease                                  |
| <b>Cura, J (2012)[19]</b>                | The Philippines | 6                                   | 17-21                          | Interpretive phenomenological analysis                                | In-depth interviews, and participant diaries.          | Ricoeur's theory of interpretation                         | Transition from adolescence to adulthood in patients on dialysis who have ESRD                                                     |
| <b>Kim, S and Choi H (2016)[20]</b>      | South Korea     | 9                                   | 12-18                          | Qualitative                                                           | In-depth interviews, plus one focus group              | Content analysis                                           | Renal transplant experiences of Korean adolescent transplant recipients                                                            |
| <b>Murray, P et al. (2014)[17]</b>       | UK              | 14                                  | Median age 23.5                | Mixed methods                                                         | In-depth interviews following questionnaire            | Content analysis                                           | Impact of ESRD on education and employment outcomes in young adults                                                                |
| <b>Lewis, H and Arber, S (2015a)[18]</b> | UK              | 35                                  | 20-30                          | Qualitative                                                           | In-depth interviews                                    | Modified grounded theory                                   | Exploring impact of age at onset (<20 years of age, essentially a young age of onset) of ESRD on education and employment outcomes |
| <b>Lewis, H and Arber, S (2015b)[21]</b> | UK              | 40                                  | 16-30                          | Qualitative                                                           | In-depth interviews                                    | Modified grounded theory – social constructionist approach | Exploring the role of the body in end-stage kidney disease in young adults: gender, peer and intimate relationships                |

1  
2  
3  
4  
5  
6  
7  
8  
9  
10  
11  
12  
13  
14  
15  
16  
17  
18  
19  
20  
21  
22  
23  
24  
25  
26  
27  
28  
29  
30  
31  
32  
33  
34  
35  
36  
37  
38  
39  
40  
41  
42  
43  
44  
45  
46  
47

|                                             |        |   |       |             |                                      |                                                         |                                                                   |
|---------------------------------------------|--------|---|-------|-------------|--------------------------------------|---------------------------------------------------------|-------------------------------------------------------------------|
| <b>Harwood, L and Johnson, B (1999)[16]</b> | Canada | 5 | 15-18 | Qualitative | In-depth, semi-structured interviews | Descriptive phenomenological analysis (Giorgi's method) | Adolescents' experiences of treatment after renal transplantation |
|---------------------------------------------|--------|---|-------|-------------|--------------------------------------|---------------------------------------------------------|-------------------------------------------------------------------|

For peer review only

Table 2. Comprehensiveness of reporting

| COREQ item                                                            | Study reference |              |             |                         |                         |           |          | No. of studies |
|-----------------------------------------------------------------------|-----------------|--------------|-------------|-------------------------|-------------------------|-----------|----------|----------------|
|                                                                       | Tong [12]       | Harwood [16] | Murray [17] | Lewis <sup>a</sup> [18] | Lewis <sup>b</sup> [21] | Cura [19] | Kim [20] |                |
| <b>Domain 1: Research team and reflexivity</b>                        |                 |              |             |                         |                         |           |          |                |
| Interviewer/facilitator identified                                    | X               |              |             | X                       | X                       | X         |          | 4              |
| Researcher credentials                                                | X               |              |             | X                       |                         | X         |          | 3              |
| Occupation of researcher                                              |                 |              |             |                         |                         | X         |          | 1              |
| Gender of researcher                                                  | X               |              |             | X                       | X                       | X         |          | 4              |
| Experience and training                                               |                 |              |             | X                       |                         |           |          | 1              |
| Prior/existing relationship with participants                         |                 |              |             |                         |                         |           |          | 0              |
| Participant knowledge of interviewer                                  |                 |              |             |                         |                         |           |          | 0              |
| Interviewer characteristics e.g. bias, assumptions, interest in topic |                 |              |             | X                       |                         |           |          | 1              |
| <b>Domain 2: Study design</b>                                         |                 |              |             |                         |                         |           |          |                |
| Methodology and theory                                                | X               | X            | X           | X                       | X                       | X         | X        | 7              |
| Sampling strategy                                                     | X               | X            | X           | X                       | X                       | X         | X        | 7              |
| Method of approach/invitation                                         | X               | X            |             |                         |                         |           |          | 2              |
| Sample size                                                           | X               | X            | X           | X                       | X                       | X         | X        | 7              |
| Non-participation                                                     | X               |              |             |                         |                         |           |          | 1              |
| Setting of data collection                                            | X               |              |             | X                       | X                       | X         | X        | 5              |
| Presence of non-participants                                          | X               |              |             |                         |                         |           | X        | 2              |
| Description of sample e.g. demographics                               | X               | X            |             | X                       | X                       | X         | X        | 6              |
| Interview guide                                                       | X               |              |             |                         |                         |           |          | 1              |
| Repeat interviews                                                     |                 |              |             |                         |                         | X         |          | 1              |
| Audio/visual recording                                                | X               | X            | X           | X                       | X                       | X         | X        | 7              |
| Field notes                                                           |                 |              |             |                         |                         | X         |          | 1              |
| Duration                                                              | X               |              |             |                         |                         | X         | X        | 3              |
| Data saturation                                                       | X               | X            |             | X                       |                         |           | X        | 4              |
| Transcripts returned                                                  |                 |              |             |                         |                         |           |          | 0              |
| <b>Domain 3: Analysis and findings</b>                                |                 |              |             |                         |                         |           |          |                |

1  
2  
3  
4  
5  
6  
7  
8  
9  
10  
11  
12  
13  
14  
15  
16  
17  
18  
19  
20  
21  
22  
23  
24  
25  
26  
27  
28  
29  
30  
31  
32  
33  
34  
35  
36  
37  
38  
39  
40  
41  
42  
43  
44  
45  
46  
47

|                                              |           |           |                                                                                                    |           |           |           |           |   |
|----------------------------------------------|-----------|-----------|----------------------------------------------------------------------------------------------------|-----------|-----------|-----------|-----------|---|
| Number of data coders                        | X         |           | X                                                                                                  |           |           | X         | X         | 4 |
| Description of coding tree                   |           |           |                                                                                                    |           |           |           |           | 0 |
| Derivation of themes – in advance or derived | X         | X         | X                                                                                                  | X         | X         | X         | X         | 7 |
| Software                                     | X         |           | X                                                                                                  | X         | X         |           |           | 4 |
| Participant checking                         |           |           |                                                                                                    |           |           |           | X         | 1 |
| Quotations presented                         | X         | X         | X                                                                                                  | X         | X         | X         | X         | 7 |
| Data and findings consistent                 | X         | X         | X<br>But<br>primarily<br>quantitative<br>analysis –<br>qualitative<br>themes<br>under-<br>reported | X         | X         | X         | X         | 7 |
| Clarity of major themes                      | X         | X         |                                                                                                    |           | X         | X         | X         | 5 |
| Clarity of minor themes                      | X         | X         |                                                                                                    |           |           |           |           | 1 |
| <b>Total number of COREQ items</b>           | <b>22</b> | <b>12</b> | <b>9</b>                                                                                           | <b>16</b> | <b>13</b> | <b>18</b> | <b>15</b> |   |

1  
2  
3  
4  
5  
6  
7  
8  
9  
10  
11  
12  
13  
14  
15  
16  
17  
18  
19  
20  
21  
22  
23  
24  
25  
26  
27  
28  
29  
30  
31  
32  
33  
34  
35  
36  
37  
38  
39  
40  
41  
42  
43  
44  
45  
46  
47  
48  
49  
50  
51  
52  
53  
54  
55  
56  
57  
58  
59  
60

For peer review only



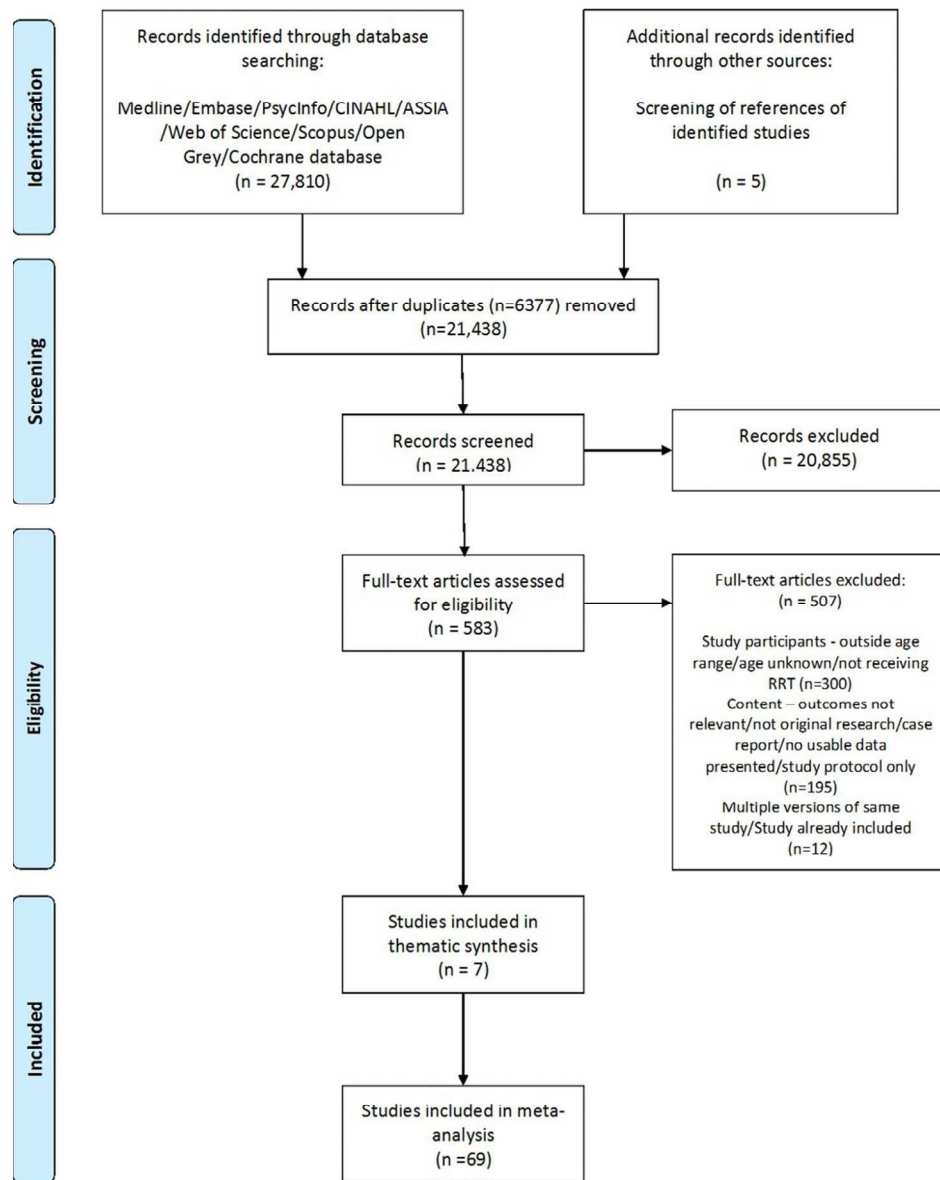

Figure 1. Systematic search results for studies

190x229mm (150 x 150 DPI)

# BMJ Open

## Young Adults' Perspectives on Living with Kidney Failure: a Systematic Review and Thematic Synthesis of Qualitative Studies

|                                 |                                                                                                                                                                                                                                                                                                                                               |
|---------------------------------|-----------------------------------------------------------------------------------------------------------------------------------------------------------------------------------------------------------------------------------------------------------------------------------------------------------------------------------------------|
| Journal:                        | <i>BMJ Open</i>                                                                                                                                                                                                                                                                                                                               |
| Manuscript ID                   | bmjopen-2017-019926.R1                                                                                                                                                                                                                                                                                                                        |
| Article Type:                   | Research                                                                                                                                                                                                                                                                                                                                      |
| Date Submitted by the Author:   | 24-Nov-2017                                                                                                                                                                                                                                                                                                                                   |
| Complete List of Authors:       | Bailey, Philippa; University of Bristol, School of Social and Community Medicine; North Bristol NHS Trust, Hamilton, Alexander<br>Clissold, Rhian<br>Inward, Carol<br>Caskey, Fergus; University of Bristol<br>Ben-Shlomo, Yoav; University of Bristol,<br>Owen-Smith, Amanda; University of Bristol, School of Social and Community Medicine |
| <b>Primary Subject Heading</b>: | Renal medicine                                                                                                                                                                                                                                                                                                                                |
| Secondary Subject Heading:      | Qualitative research                                                                                                                                                                                                                                                                                                                          |
| Keywords:                       | Psychosocial impact, QUALITATIVE RESEARCH, Renal Replacement Therapy, Thematic synthesis, Young adults                                                                                                                                                                                                                                        |
|                                 |                                                                                                                                                                                                                                                                                                                                               |

SCHOLARONE™  
Manuscripts

1  
2  
3  
4 Young Adults' Perspectives on Living with Kidney Failure: a Systematic Review and  
5  
6 Thematic Synthesis of Qualitative Studies  
7  
8  
9

10 Pippa K Bailey BA BM BCh MRCP DTM&H PhD <sup>1,2,3</sup>

11  
12  
13 Alexander J Hamilton BSc MBBS, MRCP <sup>1,4</sup>

14  
15  
16 Rhian L Clissold BSc MB ChB MRCP <sup>5</sup>

17  
18  
19 Carol D Inward MB BCh MD FRCPCH <sup>6</sup>

20  
21  
22 Fergus J Caskey MB ChB MSc MD FRCP <sup>1,3,4</sup>

23  
24  
25 Yoav Ben-Shlomo MB BS MSc PhD MRCP <sup>1</sup>

26  
27  
28 Amanda Owen-Smith MSc PhD <sup>1</sup>

29  
30 <sup>1</sup>Bristol Medical School: Population Health Sciences, Canynge Hall, Bristol, BS8 2PS, UK

31  
32 <sup>2</sup>Bristol Medical School: Translational Health Sciences, 69 St Michaels's Hill, Bristol, BS2  
33 8DZ, UK

34  
35  
36 <sup>3</sup>The Richard Bright Renal Unit, Southmead Hospital, North Bristol NHS Trust, Bristol,  
37 BS10 5NB, UK

38  
39  
40 <sup>4</sup>UK Renal Registry, Learning and Research Building, Southmead Hospital, Bristol, BS10  
41 5NB, UK

42  
43  
44 <sup>5</sup>Institute of Biomedical and Clinical Science, University of Exeter Medical School, Exeter,  
45 UK

46  
47  
48 <sup>6</sup>Bristol Royal Hospital for Children, 24 Upper Maudlin St, Bristol BS2 8BJ, UK

49  
50  
51 CORRESPONDING AUTHOR

52  
53 Dr Pippa K Bailey, G.13, Canynge Hall, 39 Whatley Road, Bristol, BS8 2PS, UK.

54  
55 [pippa.bailey@bristol.ac.uk](mailto:pippa.bailey@bristol.ac.uk)

1  
2  
3 **Keywords**

4 Psychosocial impact; Qualitative research; Renal Replacement Therapy; Thematic synthesis;  
5  
6 Young adults.  
7  
8  
9

10 **Word count**

11  
12 4139 words  
13  
14  
15  
16  
17  
18  
19  
20  
21  
22  
23  
24  
25  
26  
27  
28  
29  
30  
31  
32  
33  
34  
35  
36  
37  
38  
39  
40  
41  
42  
43  
44  
45  
46  
47  
48  
49  
50  
51  
52  
53  
54  
55  
56  
57  
58  
59  
60

For peer review only

## Abstract

### Introduction

Young adults fare worse than younger adolescents or older adults on a broad range of health indicators. Those with a chronic illness such as renal failure are a particularly vulnerable group, who experience poor outcomes compared to both children and older adults.

Understanding how being in receipt of renal replacement therapy (RRT) affects the lives of young adults might help us to better prepare and support these individuals for and on RRT, and improve outcomes. This study aimed to synthesize research describing young adults' experiences of the psychosocial impact of kidney failure and RRT.

### Design

A systematic literature review identified qualitative research reporting the perspectives of 16-30 year olds receiving RRT on the psychosocial impact of renal failure. Electronic databases (including Medline/EMBASE/PsycINFO/ASSIA) were searched to November 2017 for full-text papers. The transparency of reporting of each study was assessed using the COREQ framework. Quality was assessed using the CASP qualitative checklist. An inductive thematic synthesis was undertaken.

### Participants

7 studies from 5 different countries were included, comprising 123 young adults receiving RRT.

### Results

Comprehensiveness of reporting was variable: studies reported 9 to 22 of the 32 COREQ-checklist items.

1  
2  
3 Three global themes about the impact of kidney failure on young adults were identified: 1)  
4 Difference desiring normality; 2) Thwarted or moderated dreams and ambitions; 3)  
5  
6  
7 Uncertainty and liminality. These reflected five organising themes: i) Physical appearance  
8  
9 and body image; ii) Activity and participation; iii) Educational disruption and  
10  
11 underachievement; iv) Career ambitions and employment difficulties; and v) Social isolation  
12  
13 and intimate relationships.  
14

## 15 16 **Conclusions**

17  
18  
19 Across different countries and different healthcare settings, young adults on RRT experience  
20  
21 difference and liminality, even after transplantation. Tailored social and psychological  
22  
23 support is required to allow young adults to experience wellness whilst in receipt of RRT, and  
24  
25 not have life on hold.  
26  
27  
28  
29  
30

## 31 **Strengths and limitations of this study**

- 32  
33  
34
- 35 • This is the first attempt to synthesise the existing qualitative literature that investigates  
36 the impact of renal failure on young adults.
  - 37 • The number of participants included was large and multinational.
  - 38 • The emergent themes were represented across the included studies, supporting the  
39 validity of the findings.
  - 40 • The quality of reporting of the included studies was variable, and the quality of the  
41 research undertaken was sometimes difficult to assess due to the poor standard of  
42 reporting.
  - 43  
44  
45  
46  
47  
48  
49  
50  
51
- 52  
53  
54  
55  
56  
57  
58  
59  
60

## Introduction

Young adults fare worse than younger adolescents or older adults on a broad range of health indicators [1-3]. Those with a chronic illness such as renal failure are a particularly vulnerable group [4]. Most young adults on RRT have a kidney transplant: in the UK 73% of 18-24 year olds on RRT have a functioning transplant [5]. Young adults with a transplant have an increased risk of transplant graft failure compared to both children and older adults [6, 7]. Understanding how renal failure affects the mental health, education, career ambitions, social lives and relationships of young adults might help us to better prepare and support these individuals for and on RRT, and improve outcomes.

Qualitative research can provide valuable insight into the impact of disease on an individual's life and lived experience, but single qualitative studies are often from one geographical area or healthcare centre, and often focus on a single aspect of experience rather than a spectrum. Thematic syntheses combine the findings from individual studies, to generate a rich, holistic, more complete understanding of the phenomena being investigated [8], and generate new findings.

This thematic synthesis aimed to identify and synthesise qualitative research describing how kidney failure impacts on the lives of young adults, to identify areas which might require research and clinical attention, to ultimately improve patient outcomes. A systematic review and meta-analysis of the quantitative research on the psychosocial impact of RRT on young adults was undertaken alongside this qualitative synthesis, the results of which are reported elsewhere [9]. This paper presents the findings of the qualitative literature synthesis, which might help us to explain the quantitative findings, adding the patient voice and rich context to numerical results [10].

## Methods

We followed the Enhancing Transparency in Reporting the Synthesis of Qualitative Research (ENTREQ) framework [11].

## Search Strategy

A sensitive search strategy was applied to 9 databases (Medline, EMBASE, PsycINFO, ASSIA, CINAHL, Web of Science, Scopus, Open Grey, and Cochrane Library). The full search strategy for the Medline, EMBASE and PsycINFO databases is provided as supplementary material (Supplementary material – Search strategy). We ran our first search in July 2015, and a final search in November 2017, for the latter limiting results to those from the last year only. We used Endnote™ to identify duplicate studies. AH screened the titles and abstracts of all the citations resulting from the search to identify studies fulfilling the inclusion criteria. PB screened the titles and abstracts of all the citations resulting from the final search. RC screened a random sample of 1000 titles and abstracts to ensure consistency. Any disagreements were resolved by discussion. When the literature database did not already provide a translated title and abstract, Google Translate was used to screen non-English abstracts: no relevant non-English articles were identified.

## Study Selection

We included qualitative studies of young adults (aged 16-30 years) on RRT (dialysis and transplants) that explored participants' perspectives on and experiences of the impact of renal failure on their lives (including education, employment, social life, relationships, and psychological health). Studies were included if all or the majority (>50%) of participants were in this range. When studies included participants aged <16 or >30 years, quotes from those participants were excluded from analysis. There is no consensus definition for young



1  
2  
3 adulthood, and we chose a priori a wider age-range to ensure we did not miss any important  
4 publications. Globally, the legal age at which individuals enter adulthood varies between 16  
5 and 21, and there is generally a gradual transition to full adult status. All included qualitative  
6 articles were double-checked by PB to ensure they met the inclusion criteria. The references  
7 of identified articles were screened to identify any additional papers. One study [12] analysed  
8 interviews with young people who had Chronic Kidney Disease (CKD) as well as individuals  
9 on dialysis. The lead author was contacted to request access to the original transcripts of  
10 those patients on dialysis, but the study's ethical approval did not allow transcripts to be  
11 shared. A decision was made to include this study, extracting the findings but excluding the  
12 quotes from individuals not on RRT. This decision was made as the paper was the highest  
13 quality study identified, the majority of the illustrative quotes were from individuals on  
14 dialysis (30/39 quotes presented in table), and the themes identified were deemed relevant to  
15 our study, and overlapped with findings from other included studies.

16  
17  
18  
19  
20  
21  
22  
23  
24  
25  
26  
27  
28  
29  
30  
31 We assessed the transparency of reporting of each study using the Consolidated Criteria for  
32 Reporting Qualitative Health Research (COREQ) framework [13]. The quality of the  
33 included studies was assessed using the Critical Appraisal Skills Programme (CASP)  
34 Qualitative Research Checklist [14]. PB assessed all seven studies. RC and AH independently  
35 assessed two papers and any differences were discussed as a group. No study with relevant  
36 data was excluded from the synthesis.

### 47 48 **Thematic Synthesis**

49  
50 Inductive thematic synthesis was undertaken with reference to the method outlined by  
51 Thomas and Harden [15]. The text in the results sections of each article was extracted  
52 electronically and entered verbatim into NVivo 10 qualitative software [16] for analysis. Data  
53  
54  
55  
56  
57  
58  
59  
60

1  
2  
3 was analysed inductively. Line-by-line coding was undertaken, assigning sections of text  
4  
5 descriptive labels. Codes were then grouped on the basis of shared properties to create  
6  
7 concepts, which were grouped into themes. Subsequent studies were coded into pre-existing  
8  
9 concepts, and new concepts were created when deemed necessary. Thus themes were  
10  
11 identified and analytic induction used to identify any patterns arising. Relationships between  
12  
13 themes were identified and explored. PB and AOS independently coded all the papers. PB  
14  
15 and AOS discussed their findings and any coding discrepancies to maximise rigour and  
16  
17 reliability.  
18  
19  
20  
21  
22

## 23 Results

24  
25 We included 7 studies (Figure 1), from 5 different countries, comprising 123 young adults  
26  
27 receiving RRT. All studies were published in English; two were undertaken in countries in  
28  
29 which English was not the primary language. All studies used in-depth semi-structured  
30  
31 interviews to collect data, with some also using focus groups, diaries, and questionnaires  
32  
33 (Table 1).  
34  
35

36  
37 Comprehensiveness of reporting was variable: studies reported between 9 and 22 of the 32  
38  
39 COREQ-checklist items (Table 2). Only 4 studies reported that theoretical data saturation had  
40  
41 been reached. One study reported that this had been reached after only interviewing 5  
42  
43 participants [17] which is unexpected with such a small sample. Only one study was  
44  
45 accompanied by an interview topic guide [12]. One paper presented the findings from a  
46  
47 mixed-methods study, but details regarding the qualitative analysis were lacking [18]. Two  
48  
49 studies suggested differences in the experiences of young adults who developed renal failure  
50  
51 as children compared to those who were diagnosed as young adults [12, 19]. The quality of  
52  
53 the studies was sometimes difficult to assess due to poor reporting: findings are presented in  
54  
55 Table 3.  
56  
57  
58  
59  
60

## Themes

Three global themes about the psychosocial impact of renal failure on young adults were identified: 1) Difference desiring normality; 2) Thwarted or moderated dreams and ambitions; and 3) Uncertainty and liminality. These reflected five organising themes: i) Physical appearance and body image; ii) Activity and participation; iii) Educational disruption and underachievement; iv) Career ambitions and employment difficulties; and v) Social isolation and intimate relationships (Figure 2).

Results are now presented under the three global themes with reference to the organising themes. Participant quotes illustrate themes. When reported in the primary research paper the characteristics of the person to whom the quote belongs are provided after the quote: *Key: Age (in years), Sex (M=male; F=female), RRT (HD=haemodialysis; PD=peritoneal dialysis; Tx=transplant)*

### Difference desiring normality

Study participants reported that they felt different to their peers; difference appeared to be perceived and reported as negative by all participants, who expressed strong desires to be 'normal'. Difference was primarily characterised by differences in physical appearance, and by differences in ability to participate in activities. While young adults who had developed renal disease in childhood reported desiring a perceived normality, young adults who developed renal failure in young adulthood also described 'an unbearable loss' of a previously experienced normality [12].

1  
2  
3 “Going from living a normal life, from what I knew, to being in hospital  
4 most of the time...I don’t like it.”(18,M,HD)[12] [Key: Age, Sex, RRT  
5 (HD=haemodialysis; PD=peritoneal dialysis; Tx=transplant)]  
6  
7

8  
9  
10 “To look at me just like before, when I did not have the illness. Treat me  
11 normally.” (18,M,HD)[20]  
12  
13

#### 14 *Physical appearance and body image*

15  
16 Participants across studies reported problems with being physically different to peers, due to  
17 surgical interventions (e.g.peritoneal dialysis catheters), medication (e.g. weight gain), and  
18 chronic illness (e.g. short stature).  
19  
20  
21  
22

23  
24 “It can make you a bit like self-conscious if you have the tube. You worry  
25 that people can see it through your clothes or the scars...”(16,F,PD)[12]  
26  
27

28  
29 These differences in physical appearance were often described using terminology suggesting  
30 a sense of dehumanisation and mechanisation, such as looking “like a robot” and feeling like  
31 a “wood block.”[21]  
32  
33  
34

35  
36 Many participants described finding that to some extent transplantation provided the physical  
37 normality they’d desired, resulting in:  
38  
39  
40

41 “[a] face without swelling,” and “no more being hairy” [21]  
42  
43

44 However, others experienced further physical changes following transplantation:  
45  
46

47 “I’m covered in scars... my face is really fat... I just hate looking at myself,  
48 I think I look like a freak.”(28,F,Tx)[22]  
49  
50

51 “...prednisone [steroids] makes me eat a lot and gain weight...”[17]  
52  
53  
54  
55  
56  
57  
58  
59  
60

### *Activity and participation*

As well as physical differences preventing individuals from feeling ‘normal’, study participants reported barriers to participating in everyday activities. Being able to participate in sport [22] and education were seen as particularly vital to being normal:

*“While being on dialysis, I couldn’t soak in water. When I went to a water park after the transplant, it was quite wonderful as I didn’t need to attach a bandage to my body anymore, could get along with friends, and was not different from others.” (17,F,Tx) <sup>20</sup>*

*“The local education... wanted me to go to a special school, for people with learning difficulties... My Mum and Dad were like, ‘No, he hasn’t got a physical disability, it’s a medical condition, we want him to go to a normal school like all his friends and be treated normally.’” (27,M,HD) <sup>18</sup>*

Young adults tried to engage in the same activities as their peers, by denying their health problems, lying about hospital appointments, and missing medication when socialising:

*“I’d lie [about missing school for clinic]. I’d say I went to visit my girlfriend you know. You don’t say ‘I went to the hospital,’ ...It’s stupid. I just say I went to visit someone, or I didn’t feel like coming.”<sup>16</sup>*

*“I didn’t take (my tablets) on time, ever.... It was an embarrassment... I was going out with friends, they were drinking, smoking, doing things and there was me with a tablet box.” (26,F,Tx)<sup>21</sup>*

1  
2  
3 A few participants described feeling a sense of normality when they had individually  
4 accepted their health problems, and had successfully developed an identity separate to their  
5 illness:  
6  
7

8  
9  
10 *“[I started] to build more of an identity for myself that wasn't so centred on*  
11 *my illness and it was more like...I do have an illness yet I still want to*  
12 *establish that I'm a normal teenager like everyone else.”(19,M,HD)[12]*  
13  
14  
15

### 16 17 18 19 Thwarted or moderated dreams and ambitions

20 Many participants described a sense of underachievement and lost opportunities, related to  
21 education, employment, and intimate relationships.  
22  
23  
24  
25

### 26 27 28 29 *Educational disruption and underachievement*

30 Young adults reported that renal failure negatively impacted on their educational  
31 achievement whatever their educational level when starting RRT:  
32  
33  
34

35  
36  
37 *“Cos I'd started haemo... my [high school exam] results were really quite*  
38 *bad... I was really, really upset... I went on to University... but I'd still not*  
39 *done English and Maths.”(24,F,Tx)[19]*  
40  
41  
42

43 Some participants directly attributed educational underachievement to their disease and  
44 treatment, whilst others felt personally responsible, reporting that they had allowed their  
45 illness to affect their achievements:  
46  
47  
48  
49

50  
51 *“When everyone was graduating year 12, I'm thinking oh, that could have*  
52 *been me if I didn't let everything get in the way.”(18,F,HD)[12]*  
53  
54  
55

1  
2  
3 Many participants, despite feeling they had underachieved, had often still succeeded in  
4  
5 gaining significant qualifications:

6  
7  
8 *“For the whole of my Finals year I was on dialysis. It was quite a struggle,*  
9  
10 *I would have got a 1st, but I got a 2(i).”(28,M,HD)[19]*

### 11 12 *Career ambitions and employment difficulties*

13  
14 Participants moderated their career expectations with many reporting that they were able to  
15  
16 find employment, but sometimes in jobs which were not what they'd hoped for:

17  
18  
19 *“I can get a job, like in a shop, but it doesn't really do much for*  
20  
21 *me.”(29,M,Tx)[19]*

22  
23  
24 One participant powerfully described his gradual realisation of the impact of renal failure on  
25  
26 his career ambitions [12]:

27  
28  
29 *Interview quote: “It's always been a military career for me and nothing*  
30  
31 *else, and the thing is that this kidney puts that whole dream and that whole*  
32  
33 *lifestyle at risk, like even if I get this [transplant], there's thousands of*  
34  
35 *really strong men and nothing wrong with them at all that go for that and*  
36  
37 *they don't get it, so you know like I have to work my arse off ten times*  
38  
39 *harder and there's still no guarantee that I'm going to get it, and that's like*  
40  
41 *the only career I've ever wanted, I can't think of myself doing anything else.*  
42  
43 *I feel like that, this seems to have taken a lot of things away.” (16,M,PD)<sup>12</sup>*

44  
45  
46  
47  
48  
49  
50 *Later journal entry: “Today we went to hospital for some transplant*  
51  
52 *education. It involved a detailed description of the procedure and*  
53  
54 *medication I would go through. I was feeling good about it when a sudden*  
55  
56  
57  
58  
59  
60

1  
2  
3 realization hit me. Since I would be on anti-rejection drugs to keep my  
4 immune system down so it would not attack the new kidney, I would be  
5 more likely to get disease and sick which makes a career in the army a not  
6 so likely future. I mean healthy normal men don't always get in and I'd be  
7 expected to fight in environments w[h]ere disease like dysentery and  
8 malaria are common. As if the fact that I've had renal failure didn't screw  
9 up my chances enough." (16,M,PD) (journal)<sup>12</sup>  
10  
11  
12  
13  
14  
15  
16  
17  
18  
19  
20

21 Disclosure of their renal disease to employers was perceived, and had been experienced by  
22 some, as a challenge, the timing of which was thought to be crucial:  
23  
24  
25

26 "If you [kidney patient] put your CV in and you [employer] get a 'normal'  
27 CV in; 'I can work full time, there's nothing wrong with me.' Well, who  
28 would you choose?" (Age not provided, F, Tx)<sup>17</sup>  
29  
30  
31  
32

33 "My attitude... is to demonstrate... that I am more than capable of doing  
34 whatever it is that they want me to do. Once that has been established I tell  
35 them. I delay disclosure... that is the tactic." (28,M,HD)<sup>18</sup>  
36  
37  
38  
39  
40  
41  
42

### 43 *Social isolation and intimate relationships*

44 Participants described experiencing social isolation from peers as a result of their renal  
45 disease. Sometimes this was associated with self-imposed isolation due to a dislike of their  
46 physical appearance (see 'Physical appearance and body image'):  
47  
48  
49  
50

51  
52 "(Transplantation) made me...huge basically...I didn't go out for...about 3  
53 months... 'cos I felt like everyone was looking at me.'" (19,F,Tx)[22]  
54  
55  
56  
57  
58  
59  
60



1  
2  
3 Some participants reported experiencing name-calling [17] and bullying by peers because of  
4  
5 their physical difference [21].  
6

7  
8 Sometimes social isolation resulted from feeling physically unwell or due to needing to  
9  
10 dialyse:

11  
12 *“...you're so distanced from your friends, like they're off enjoying being*  
13  
14 *eighteen, going to parties and everything, and I'm here stuck doing*  
15  
16 *dialysis.” (18,F,HD)[12]*  
17  
18

19  
20 Renal failure was described by young adults as having a particularly significant impact on  
21  
22 their confidence in pursuing, and ability to establish and maintain intimate relationships.  
23

24 Young adults were concerned with finding a partner who would accept their need for RRT:

25  
26  
27 *“With my future, I'm mostly worried about relationships. Will I ever meet a*  
28  
29 *guy who'll be there for me no matter what? Will he care if I'm still doing*  
30  
31 *dialysis?”(18,F,HD)[12]*  
32  
33

34 Participants in several studies perceived rejection by a partner as being because of their renal  
35  
36 disease [17, 22]. Some participants used the internet to find partners, and ‘avoided the kind of  
37  
38 pain incurred by more ‘personal’ rejection’ [22].  
39  
40

41 The themes of fertility and parenthood were key for older participants. There were multiple  
42  
43 concerns, regarding fertility, heritable renal disease, the safety of pregnancy, and the impact  
44  
45 of renal disease on the ability to be a long-living and active parent:  
46  
47

48  
49 *“We'd love kids... But, do you pass the problem on... then die half-way*  
50  
51 *through as well?”(27,M,Tx)[22]*  
52  
53  
54  
55  
56  
57  
58  
59  
60

### Uncertainty and liminality

The lives of the young adults appeared to be characterised by perpetual uncertainty.

Participants across the studies expressed feelings suggestive of a sense of liminality related to their renal disease: that is, of experiencing periods of ‘middle ground’ or time spent ‘treading water’ before the final goal of receiving a transplant. During these liminal periods, participants described putting life ‘on hold’:

One participant ‘cut his girlfriend off’ while on dialysis [22]. Others on dialysis decided to wait until they ‘got a transplant’ to seek a partner [22]:

*“(I thought) I’m just going to... be on dialysis for a little while, have a transplant, then I can ‘move on’ (find a partner), because everything’s easier once you’ve had a transplant.”(28,M,Tx)[22]*

Participants described ‘being shunted back and forth between wellness and illness, with intense periods of ill health, followed by variable periods of relative stability, sometimes lengthy, with a successful transplant.’[19] Young adults reported that periods of stability felt precarious and were often disrupted:

*“I had the dialysis problems at the wrong time...I’d just started (college) I thought I got them all sorted, then all re-occurred...so I had to stop the course.”(29,M,Tx)[19]*

For most participants the liminal phase described time on dialysis before transplantation.

However, the sense of finally having reached the ‘end goal’ of transplantation was often not sustained, as participants began to recognise that they were still different, and still had to manage restrictions in diet, medication, and activities [21].

1  
2  
3 Uncertainty was felt regarding all aspects of their lives, not just physical health, and included  
4 concerns regarding future employment, relationships, and parenthood (see other organising  
5 themes).  
6  
7  
8  
9  
10  
11  
12

### 13 Discussion

14  
15  
16  
17 Young adults reported that renal failure impacted on their ambitions and life-goals, and their  
18 capacity and opportunities to achieve them. RRT impacted on their developing personal  
19 identity by affecting their education, career ambitions, employment capabilities, social  
20 activities, and personal relationships. They described a sense of difference, and uncertainty,  
21 both of which were intertwined with a sense of social isolation.  
22  
23  
24  
25  
26  
27

28 In qualitative syntheses of research with older adults [23, 24], participants have described  
29 RRT affecting their personal identity, as well as impacting on existing relationships with  
30 spouses/partners and children [23, 24]. This contrasts with our findings in young adults who  
31 describe renal failure as impacting on the *development* of their identity, and their capacity to  
32 form relationships, and gain employment. The concerns of younger adults specifically relate  
33 to establishing key aspects of their lives, rather than managing the impact on an established  
34 life.  
35  
36  
37  
38  
39  
40  
41  
42  
43  
44  
45  
46

### 47 Liminality

48  
49 The concept of liminality, developed by anthropologist van Gennep in his work on rites of  
50 passage [25], describes a state of 'being inbetween' pre and post 'ritual' states. Turner  
51 described liminality as a space in which individuals are "neither one thing nor another; or  
52  
53  
54  
55  
56  
57  
58  
59  
60

1  
2  
3 maybe both”[26], and a transitional intervening period between “two relatively fixed or stable  
4  
5 conditions”[26].  
6

7  
8 The emerging adults in this study were already in a liminal state, between childhood and  
9  
10 older/full adulthood. In addition, participants described being in a liminal state with respect to  
11  
12 their renal disease, which in many ways prolonged the liminal phase they were already  
13  
14 experiencing as a young adult as they put life ‘on hold’. Liminality was particularly  
15  
16 experienced on dialysis, while participants awaited transplantation. This has previously been  
17  
18 described in the renal literature [27, 28], including the experience of transplantation not  
19  
20 always delivering the desired/expected normality of wellness, and so in many ways  
21  
22 continuing the liminal state [27].  
23  
24  
25  
26  
27

28 A recent quantitative systematic review and meta-analyses found that compared with healthy  
29  
30 peers, young adults with transplants had lower quality of life [9]. Our thematic synthesis  
31  
32 suggested possible reasons for this: including the effects of transplant medications on  
33  
34 appearance, and ongoing restrictions in diet, medication and activities. The poor quality of  
35  
36 life is also likely to be explained by the persistent sense of liminality, and experience of  
37  
38 transplantation as not the ‘normal life’ that was anticipated pre-transplantation.  
39  
40

41  
42 This thematic synthesis found that young people had to moderate career expectations due to  
43  
44 their disease, resulting in a mismatch between the jobs they wanted and those they were  
45  
46 offered. Participants also reported difficulties disclosing their disease to employers, with a  
47  
48 perceived impact on the likelihood of and security of employment. Many individual  
49  
50 quantitative studies, have reported that young adults on RRT are more likely to be  
51  
52 unemployed [9, 18, 29-32]: often despite education levels comparable to their healthy peers  
53  
54 [9, 29, 32]: these qualitative findings highlight possible reasons for this.  
55  
56  
57  
58  
59  
60

1  
2  
3 Numerous quantitative studies have reported that young adults on RRT are less likely to be  
4 married or to have a long-term partner [9, 30, 33, 34]. The thematic synthesis found that  
5 young adults reported that their renal disease had an impact on their confidence in pursuing,  
6 and ability to establish and maintain intimate relationships. Young adults reported concerns  
7 finding a partner who would accept their need for RRT, and many reported rejection as a  
8 result of their renal failure. Concerns regarding fertility, heritable disease and parenthood  
9 were also reported as impacting on relationships. The sense of difference identified in the  
10 synthesis is likely to both cause and result from the described differences in employment,  
11 intimate relationships and social isolation.  
12  
13  
14  
15  
16  
17  
18  
19  
20  
21  
22  
23  
24  
25

### 26 Clinical implications and future research

27  
28 Psychosocial outcomes in patients on RRT have been identified by older adult patients as a  
29 priority for future research [35, 36]. At the moment the research priorities of young adults are  
30 being investigated as part of the SONG-Kids priority setting work, which includes ‘children  
31 aged up to 21 years’[37]. There is a need for specific research into the priorities of young  
32 adults.  
33  
34  
35  
36  
37  
38

39 Mental health appeared to have been under-investigated in the included qualitative studies:  
40 two studies reported that two young adults had reported feeling suicidal [12, 17] but this was  
41 not described further. Some participants described feelings of hopelessness [12], and body  
42 image concerns. Formal research into mental health problems in young adults with renal  
43 disease is required.  
44  
45  
46  
47  
48  
49

50  
51 A number of clinical interventions could be considered to better support young adults on  
52 RRT, who have unique needs associated with the development of personal identity and  
53 achieving life aims. The development of young adult clinics (including individuals diagnosed  
54  
55  
56  
57  
58  
59  
60

1  
2  
3 in young adulthood as well as those transitioning from paediatric care) may allow support to  
4 be tailored to these needs. The inclusion of social workers, citizens advice volunteers, youth  
5 workers, and psychologists in clinic, alongside CV-writing/interview skills workshops, and  
6 an area for socialising, has been modelled in a UK centre [38]. This model may be suitable  
7 for larger centres but a greater understanding is also needed of optimal models for smaller  
8 centres; providing this multi-disciplinary support across conditions/disciplines for young  
9 adults with chronic illness could be considered.

10  
11  
12  
13  
14  
15  
16  
17  
18 Help with managing expectations of transplantation, and support to not put life ‘on hold’  
19 while waiting is important. Young people need to be prepared for the reality of  
20 transplantation, which includes expectations of improved health, but with an ongoing  
21 treatment ‘burden’, possible complications and medication side-effects. A mindfulness-based  
22 intervention has been reported as a possible way of helping people with chronic disease to  
23 ‘experience wellness within illness’ [39].

24  
25  
26  
27  
28  
29  
30  
31  
32 Social media, online resources and dating apps can support the development of social  
33 networks, especially for those with visible signs of RRT/body image issues who want to  
34 establish a relationship before meeting in person. Online communities have been found to be  
35 helpful in allowing young adults with cystic fibrosis to build an identity and sense of self, and  
36 have been shown to help develop a social community and sociability that extends beyond  
37 illness [40].

### 48 49 **Strengths and limitations**

50  
51 To our knowledge this is the first attempt to synthesise the existing qualitative literature that  
52 investigates the impact of renal failure on young adults. The systematic review and synthesis  
53 were rigorous. Whilst the number of included studies was small, highlighting young adults as

1  
2  
3 an under-researched group, the number of participants included was large and multinational.  
4  
5 The emergent themes were represented across the included studies, supporting the validity of  
6  
7 the findings.  
8

9  
10 There were a few limitations: i) The quality of the included studies was variable, and the  
11  
12 quality of the research undertaken was sometimes difficult to assess due to the poor standard  
13  
14 of reporting; ii) Only one study published an interview topic guide, important themes may not  
15  
16 have emerged due to limited questioning. iii) Only two of the included studies explicitly  
17  
18 reported the cultural or ethnic background of study participants [12, 18] and all studies were  
19  
20 from high-income countries except for one [20]. Findings may therefore not be transferable to  
21  
22 individuals from ethnic minority groups, or to different healthcare settings.  
23  
24  
25  
26  
27

## 28 Conclusions

29  
30  
31  
32 This thematic synthesis enhances our understanding of the experiences of young adults with  
33  
34 renal failure. These results will help clinical teams to better support young adult patients and  
35  
36 better address their holistic and complex needs. Findings will also help research teams focus  
37  
38 on areas of particular importance to young adults.  
39  
40  
41  
42  
43

## 44 Contributorship statement

45  
46  
47 Research idea and study design: AH, PB, AOS; data acquisition: AH, RLC; assessment of  
48  
49 reporting and quality: PB, AH, RLC; thematic synthesis: PB, AOS; Data interpretation: PB,  
50  
51 AH, RLC, FC, YBS, CI, AOS; supervision or mentorship: AOS, YBS, FC, CI. Each author  
52  
53 contributed important intellectual content during manuscript drafting or revision and accepts  
54  
55 accountability for the overall work by ensuring that questions pertaining to the accuracy or  
56  
57  
58  
59  
60

1  
2  
3 integrity of any portion of the work are appropriately investigated and resolved. PB takes  
4 responsibility that this study has been reported honestly, accurately, and transparently; that no  
5 important aspects of the study have been omitted; and that any discrepancies from the study  
6 as planned (and, if relevant, registered) have been explained.  
7  
8  
9  
10

#### 11 12 13 14 15 Competing interests

16  
17  
18 None declared.  
19  
20  
21  
22

#### 23 24 Funding statement

25  
26 PB holds a University of Bristol and Richard Bright Renal Unit, North Bristol NHS Trust  
27 funded Clinical Lectureship. AH is funded by the Tony Wing Fellowship from Kidney Care  
28 UK (formerly the British Kidney Patient Association) and Kidney Research UK. Funders had  
29 no role in study design; collection, analysis, and interpretation of data; writing the report; or  
30 the decision to submit the report for publication.  
31  
32  
33  
34  
35  
36  
37  
38  
39  
40

#### 41 Data sharing statement

42  
43 No additional data available.  
44  
45

#### 46 Acknowledgements

47  
48 This work has been accepted for oral presentation at the 18th Congress of the European  
49 Society for Organ Transplantation (ESOT) at Barcelona in September 2017.  
50

51  
52  
53 We would like to thank Penny Whiting for help in planning this review. We thank Dee  
54 Knipe, Mairead Murphy and Penny Whiting for their help with creating and managing a  
55  
56  
57  
58  
59  
60



1  
2  
3 database for references. We acknowledge Catherine Borwick, specialist librarian, for  
4  
5 assistance with the search strategy.  
6  
7  
8  
9  
10  
11  
12

## 13 References

- 14 1. Neinstein, L. and C.J. Irwin, *Young adults remain worse off than adolescents*. J Adolesc Health, 2013. **53**(5): p. 559-61.
- 15 2. Park, M., et al., *The health status of young adults in the United States*. J Adolesc Health, 2006. **39**(3): p. 305-17.
- 16 3. Park, M., et al., *Adolescent and young adult health in the United States in the past decade: little improvement and young adults remain worse off than adolescents*. J Adolesc Health, 2014. **55**(1): p. 3-16.
- 17 4. Hamilton, A., et al., *The clinical epidemiology of young adults starting renal replacement therapy in the UK: presentation, management and survival using 15 years of UK Renal Registry data. [Epub ahead of print]*. Nephrol Dial Transplant, 2017.
- 18 5. MacNeill, S.J., et al., *UK Renal Registry 18th Annual Report: Chapter 2 UK Renal Replacement Therapy Prevalence in 2014: National and Centre-specific Analyses*. Nephron, 2016. **132** Suppl 1: p. 41-68.
- 19 6. Foster, B.J., *Heightened graft failure risk during emerging adulthood and transition to adult care*. Pediatr Nephrol, 2015. **30**(4): p. 567-76.
- 20 7. Van Arendonk, K.J., et al., *Age at graft loss after pediatric kidney transplantation: exploring the high-risk age window*. Clin J Am Soc Nephrol, 2013. **8**(6): p. 1019-26.
- 21 8. Paterson, B., et al., *Meta-Study of Qualitative Health Research: A Practical Guide to Meta-Analysis and Meta-Synthesis*. 2001, Thousand Oaks, CA: Sage Publications.
- 22 9. Hamilton, A., et al., *Socio-demographic, psychological health and lifestyle outcomes in young adults on renal replacement therapy*. Clin J Am Soc Nephrol, 2017.
- 23 10. Tong, A. and J. Craig, *Tuning into Qualitative Research-A Channel for the Patient Voice*. Clin J Am Soc Nephrol, 2016. **11**(7): p. 1128-30.
- 24 11. Tong, A., et al., *Enhancing transparency in reporting the synthesis of qualitative research: ENTREQ*. BMC Med Res Methodol, 2012. **12**: p. 181.
- 25 12. Tong, A., et al., *Experiences and perspectives of adolescents and young adults with advanced CKD*. Am J Kidney Dis, 2013. **61**(3): p. 375-84.
- 26 13. Tong, A., P. Sainsbury, and J. Craig, *Consolidated criteria for reporting qualitative research (COREQ): a 32-item checklist for interviews and focus groups*. International Journal for Quality in Health Care, 2007. **19**(6): p. 349-57.
- 27 14. *Critical Appraisal Skills Programme (CASP). CASP Qualitative Research Checklist 2017. Available at: [http://www.phru.nhs.uk/Doc\\_Links/Qualitative%20Appraisal%20Tool.pdf](http://www.phru.nhs.uk/Doc_Links/Qualitative%20Appraisal%20Tool.pdf). Accessed: 17 November 2017.*
- 28 15. Thomas, J. and A. Harden, *Methods for the thematic synthesis of qualitative research in systematic reviews*. BMC Med Res Methodol, 2008. **8**(1): p. 45.
- 29 16. *NVivo qualitative data analysis Software; QSR International Pty Ltd. Version 10, 2012.*
- 30 17. Harwood, L. and B. Johnson, *Weighing risks and taking chances: adolescents' experiences of the regimen after renal transplantation*. ANNA, 1999. **26**(1): p. 17-21.

- 1
  - 2
  - 3
  - 4
  - 5
  - 6
  - 7
  - 8
  - 9
  - 10
  - 11
  - 12
  - 13
  - 14
  - 15
  - 16
  - 17
  - 18
  - 19
  - 20
  - 21
  - 22
  - 23
  - 24
  - 25
  - 26
  - 27
  - 28
  - 29
  - 30
  - 31
  - 32
  - 33
  - 34
  - 35
  - 36
  - 37
  - 38
  - 39
  - 40
  - 41
  - 42
  - 43
  - 44
  - 45
  - 46
  - 47
  - 48
  - 49
  - 50
  - 51
  - 52
  - 53
  - 54
  - 55
  - 56
  - 57
  - 58
  - 59
  - 60
18. Murray, P., et al., *Impact of end-stage kidney disease on academic achievement and employment in young adults: a mixed methods study*. J Adolesc Health, 2014. **55**(4): p. 505-12.
19. Lewis, H. and S. Arber, *Impact of age at onset for children with renal failure on education and employment transitions*. Health, 2015. **19**(1): p. 67-85.
20. Cura, J., *Interpreting transition from adolescence to adulthood in patients on dialysis who have end-stage renal disease*. J Ren Care, 2012. **38**(3): p. 118-23.
21. Kim, S. and H. Choi, *Experiences of Korean adolescent renal transplant recipients*. J Spec Pediatr Nurs, 2016. **21**(3): p. 158-65.
22. Lewis, H. and S. Arber, *The role of the body in end-stage kidney disease in young adults: Gender, peer and intimate relationships*. Chronic Illn, 2015. **11**(3): p. 184-97.
23. Tong, A., et al., *The perspectives of adults living with peritoneal dialysis: thematic synthesis of qualitative studies*. Am J Kidney Dis, 2013. **61**(6): p. 873-88.
24. Reid, C., J. Seymour, and C. Jones, *A Thematic Synthesis of the Experiences of Adults Living with Hemodialysis*. Clin J Am Soc Nephrol, 2016. **11**(7): p. 1206-18.
25. van Gennep, A., *Les rites de passage (in French)*. 1909, Paris: Émile Nourry.
26. Turner, V., *The forest of symbols: Aspects of Ndembu ritual*. 1967, Ithaca, NY: Cornell University Press.
27. Crowley-Matoka, M., *Desperately seeking "normal": the promise and perils of living with kidney transplantation*. Soc Sci Med, 2005. **61**(4): p. 821-31.
28. Molzahn, A., A. Bruce, and L. Shields, *Learning from stories of people with chronic kidney disease*. Nephrol Nurs, 2008. **35**(1): p. 13-20.
29. Rocha, S., et al., *Impact of pediatric kidney transplantation on long-term professional and social outcomes*. Transplant Proc, 2011. **43**(1): p. 120-4.
30. Mellerio, H., et al., *Adult social and professional outcomes of pediatric renal transplant recipients*. Transplantation, 2014. **97**(2): p. 196-205.
31. Lewis, H. and S. Marks, *Differences between paediatric and adult presentation of ESKD in attainment of adult social goals*. Pediatr Nephrol, 2014. **29**(12): p. 2379-85.
32. Aasebø, W., et al., *Life situation and quality of life in young adult kidney transplant recipients*. Nephrol Dial Transplant, 2009. **24**(1): p. 304-8.
33. Reynolds, J., et al., *Psychosocial adjustment of adult survivors of a paediatric dialysis and transplant programme*. Arch Dis Child, 1993. **68**(1): p. 104-10.
34. Ehrich, J., et al., *Rehabilitation of young adults during renal replacement therapy in Europe. 2. Schooling, employment, and social situation*. Nephrol Dial Transplant, 1992. **7**(7): p. 579-86.
35. Urquhart-Secord, R., et al., *Patient and Caregiver Priorities for Outcomes in Hemodialysis: An International Nominal Group Technique Study*. Am J Kidney Dis, 2016. **68**(3): p. 444-54.
36. Tong, A., et al., *Patients' priorities for health research: focus group study of patients with chronic kidney disease*. Nephrol Dial Transplant, 2008. **23**(10): p. 3206-14.
37. Tong, A., et al., *Standardised Outcomes in Nephrology-Children and Adolescents (SONG-Kids): a protocol for establishing a core outcome set for children with chronic kidney disease*. Trials, 2016. **17**(401).
38. Chrysochou, C., et al., *An innovative model for young adult renal care*. British Journal of Renal Medicine, 2016. **21**(3): p. 60-3.
39. Doran, N., *Experiencing Wellness Within Illness: Exploring a Mindfulness-Based Approach to Chronic Back Pain*. Qual Health Res, 2014. **24**(6): p. 749-60.
40. Allen, C., et al., *Long-Term Condition Self-Management Support in Online Communities: A Meta-Synthesis of Qualitative Papers*. J Med Internet Res, 2016. **18**(3): p. e61.

1  
2  
3  
4  
5  
6  
7  
8  
9  
10  
11  
12  
13  
14  
15  
16  
17  
18  
19  
20  
21  
22  
23  
24  
25  
26  
27  
28  
29  
30  
31  
32  
33  
34  
35  
36  
37  
38  
39  
40  
41  
42  
43  
44  
45  
46  
47  
48  
49  
50  
51  
52  
53  
54  
55  
56  
57  
58  
59  
60

Figure legend

Figure 1. Systematic search results for studies

Figure 2. Thematic schema

For peer review only

Table 1. Study characteristics

| Study ID                                 | Country         | No of participants                  | Age range (yrs)                | Methodological framework e.g. ethnography, phenomenology, qualitative | Data collection e.g. in-depth interviews, focus groups | Analysis e.g. content, framework, thematic, GT             | Topic                                                                                                                              |
|------------------------------------------|-----------------|-------------------------------------|--------------------------------|-----------------------------------------------------------------------|--------------------------------------------------------|------------------------------------------------------------|------------------------------------------------------------------------------------------------------------------------------------|
| <b>Peer-reviewed journal articles</b>    |                 |                                     |                                |                                                                       |                                                        |                                                            |                                                                                                                                    |
| <b>Tong, A (2013)[12]</b>                | Australia       | 27 in total – 14 receiving dialysis | 16 aged 12-17<br>11 aged 18-24 | Qualitative                                                           | In-depth interviews and journal entries                | Thematic analysis                                          | Experiences and Perspectives of Adolescents and Young Adults With Advanced Chronic Kidney Disease                                  |
| <b>Cura, J (2012)[20]</b>                | The Philippines | 6                                   | 17-21                          | Interpretive phenomenological analysis                                | In-depth interviews, and participant diaries.          | Ricoeur's theory of interpretation                         | Transition from adolescence to adulthood in patients on dialysis who have ESRD                                                     |
| <b>Kim, S and Choi H (2016)[21]</b>      | South Korea     | 9                                   | 12-18                          | Qualitative                                                           | In-depth interviews, plus one focus group              | Content analysis                                           | Renal transplant experiences of Korean adolescent transplant recipients                                                            |
| <b>Murray, P et al. (2014)[18]</b>       | UK              | 14                                  | Median age 23.5                | Mixed methods                                                         | In-depth interviews following questionnaire            | Content analysis                                           | Impact of ESRD on education and employment outcomes in young adults                                                                |
| <b>Lewis, H and Arber, S (2015a)[19]</b> | UK              | 35                                  | 20-30                          | Qualitative                                                           | In-depth interviews                                    | Modified grounded theory                                   | Exploring impact of age at onset (<20 years of age, essentially a young age of onset) of ESRD on education and employment outcomes |
| <b>Lewis, H and Arber, S (2015b)[22]</b> | UK              | 40                                  | 16-30                          | Qualitative                                                           | In-depth interviews                                    | Modified grounded theory – social constructionist approach | Exploring the role of the body in end-stage kidney disease in young adults: gender, peer and intimate relationships                |

1  
2  
3  
4  
5  
6  
7  
8  
9  
10  
11  
12  
13  
14  
15  
16  
17  
18  
19  
20  
21  
22  
23  
24  
25  
26  
27  
28  
29  
30  
31  
32  
33  
34  
35  
36  
37  
38  
39  
40  
41  
42  
43  
44  
45  
46  
47

|                                             |        |   |       |             |                                      |                                                         |                                                                   |
|---------------------------------------------|--------|---|-------|-------------|--------------------------------------|---------------------------------------------------------|-------------------------------------------------------------------|
| <b>Harwood, L and Johnson, B (1999)[17]</b> | Canada | 5 | 15-18 | Qualitative | In-depth, semi-structured interviews | Descriptive phenomenological analysis (Giorgi's method) | Adolescents' experiences of treatment after renal transplantation |
|---------------------------------------------|--------|---|-------|-------------|--------------------------------------|---------------------------------------------------------|-------------------------------------------------------------------|

For peer review only

Table 2. Comprehensiveness of reporting

| COREQ item [13]                                                       | Study reference |              |             |                         |                         |           |          | No. of studies |
|-----------------------------------------------------------------------|-----------------|--------------|-------------|-------------------------|-------------------------|-----------|----------|----------------|
|                                                                       | Tong [12]       | Harwood [17] | Murray [18] | Lewis <sup>a</sup> [19] | Lewis <sup>b</sup> [22] | Cura [20] | Kim [21] |                |
| <b>Domain 1: Research team and reflexivity</b>                        |                 |              |             |                         |                         |           |          |                |
| Interviewer/facilitator identified                                    | X               |              |             | X                       | X                       | X         |          | 4              |
| Researcher credentials                                                | X               |              |             | X                       |                         | X         |          | 3              |
| Occupation of researcher                                              |                 |              |             |                         |                         | X         |          | 1              |
| Gender of researcher                                                  | X               |              |             | X                       | X                       | X         |          | 4              |
| Experience and training                                               |                 |              |             | X                       |                         |           |          | 1              |
| Prior/existing relationship with participants                         |                 |              |             |                         |                         |           |          | 0              |
| Participant knowledge of interviewer                                  |                 |              |             |                         |                         |           |          | 0              |
| Interviewer characteristics e.g. bias, assumptions, interest in topic |                 |              |             | X                       |                         |           |          | 1              |
| <b>Domain 2: Study design</b>                                         |                 |              |             |                         |                         |           |          |                |
| Methodology and theory                                                | X               | X            | X           | X                       | X                       | X         | X        | 7              |
| Sampling strategy                                                     | X               | X            | X           | X                       | X                       | X         | X        | 7              |
| Method of approach/invitation                                         | X               | X            |             |                         |                         |           |          | 2              |
| Sample size                                                           | X               | X            | X           | X                       | X                       | X         | X        | 7              |
| Non-participation                                                     | X               |              |             |                         |                         |           |          | 1              |
| Setting of data collection                                            | X               |              |             | X                       | X                       | X         | X        | 5              |
| Presence of non-participants                                          | X               |              |             |                         |                         |           | X        | 2              |
| Description of sample e.g. demographics                               | X               | X            |             | X                       | X                       | X         | X        | 6              |
| Interview guide                                                       | X               |              |             |                         |                         |           |          | 1              |
| Repeat interviews                                                     |                 |              |             |                         |                         | X         |          | 1              |
| Audio/visual recording                                                | X               | X            | X           | X                       | X                       | X         | X        | 7              |
| Field notes                                                           |                 |              |             |                         |                         | X         |          | 1              |
| Duration                                                              | X               |              |             |                         |                         | X         | X        | 3              |
| Data saturation                                                       | X               | X            |             | X                       |                         |           | X        | 4              |
| Transcripts returned                                                  |                 |              |             |                         |                         |           |          | 0              |
| <b>Domain 3: Analysis and findings</b>                                |                 |              |             |                         |                         |           |          |                |

|                                              |    |    |                                                                                                    |    |    |    |    |   |
|----------------------------------------------|----|----|----------------------------------------------------------------------------------------------------|----|----|----|----|---|
| Number of data coders                        | X  |    | X                                                                                                  |    |    | X  | X  | 4 |
| Description of coding tree                   |    |    |                                                                                                    |    |    |    |    | 0 |
| Derivation of themes – in advance or derived | X  | X  | X                                                                                                  | X  | X  | X  | X  | 7 |
| Software                                     | X  |    | X                                                                                                  | X  | X  |    |    | 4 |
| Participant checking                         |    |    |                                                                                                    |    |    |    | X  | 1 |
| Quotations presented                         | X  | X  | X                                                                                                  | X  | X  | X  | X  | 7 |
| Data and findings consistent                 | X  | X  | X<br>But<br>primarily<br>quantitative<br>analysis –<br>qualitative<br>themes<br>under-<br>reported | X  | X  | X  | X  | 7 |
| Clarity of major themes                      | X  | X  |                                                                                                    |    | X  | X  | X  | 5 |
| Clarity of minor themes                      | X  | X  |                                                                                                    |    |    |    |    | 1 |
| <b>Total number of COREQ items</b>           | 22 | 12 | 9                                                                                                  | 16 | 13 | 18 | 15 |   |

**Table 3. Quality assessment of included papers**

| CASP checklist items [14]                                                               | Tong [12]                   | Harwood [17]                   | Murray [18]                  | Lewis <sup>a</sup> [19] | Lewis <sup>b</sup> [22] | Cura [20]                     | Kim [21]                                                         |
|-----------------------------------------------------------------------------------------|-----------------------------|--------------------------------|------------------------------|-------------------------|-------------------------|-------------------------------|------------------------------------------------------------------|
| 1. Was there a clear statement of the aims of the research?                             | Yes                         | Yes                            | Yes                          | Yes                     | Yes                     | Yes                           | Yes                                                              |
| 2. Is a qualitative methodology appropriate?                                            | Yes                         | Yes                            | Yes                          | Yes                     | Yes                     | Yes                           | Yes                                                              |
| 3. Was the research design appropriate to address the aims of the research?             | Yes                         | Can't tell                     | Yes                          | Yes                     | Yes                     | Yes                           | Yes                                                              |
| 4. Was the recruitment strategy appropriate to the aims of the research?                | Yes                         | Can't tell                     | Yes                          | Yes                     | Yes                     | Can't tell                    | Yes                                                              |
| 5. Was the data collected in a way that addressed the research issue?                   | Yes                         | Yes                            | Yes                          | Yes                     | Yes                     | Can't tell                    | Yes                                                              |
| 6. Has the relationship between researcher and participants been adequately considered? | Can't tell                  | Can't tell                     | Can't tell                   | Yes                     | Can't tell              | Can't tell                    | Can't tell                                                       |
| 7. Have ethical issues been taken into consideration?                                   | Yes                         | Can't tell                     | Can't tell                   | Yes                     | Yes                     | Can't tell                    | Yes                                                              |
| 8. Was the data analysis sufficiently rigorous?                                         | Yes                         | No                             | No                           | Yes                     | Yes                     | No                            | Yes – although saturation reported as reached after 9 interviews |
| 9. Is there a clear statement of findings?                                              | Yes                         | Yes                            | No                           | Yes                     | Yes                     | Yes                           | Yes                                                              |
| 10. How valuable is the research?                                                       | Valuable:<br>- New insights | Limited by:<br>- Small sample. | Limited by:<br>- Qualitative | Valuable:<br>- Large    | Valuable: -<br>Large    | Limited by:<br>- Small sample | Limited by:<br>- Small sample.                                   |



1  
2  
3  
4  
5  
6  
7  
8  
9  
10  
11  
12  
13  
14  
15  
16  
17  
18  
19  
20  
21  
22  
23  
24  
25  
26  
27  
28  
29  
30  
31  
32  
33  
34  
35  
36  
37  
38  
39  
40  
41  
42  
43  
44  
45  
46  
47

|  |                                                                                                                                                                                                                                                                            |                                                                     |                                                                                                                                                                                                                                              |                                                                                                                                                                                                   |                                                                                                                                              |                                                                                               |                                                                                               |
|--|----------------------------------------------------------------------------------------------------------------------------------------------------------------------------------------------------------------------------------------------------------------------------|---------------------------------------------------------------------|----------------------------------------------------------------------------------------------------------------------------------------------------------------------------------------------------------------------------------------------|---------------------------------------------------------------------------------------------------------------------------------------------------------------------------------------------------|----------------------------------------------------------------------------------------------------------------------------------------------|-----------------------------------------------------------------------------------------------|-----------------------------------------------------------------------------------------------|
|  | <p>particularly regarding experiences of waiting for and of transplantation.</p> <ul style="list-style-type: none"> <li>- Journal in addition to interview data added rich insights.</li> <li>- Areas for service improvement in light of findings highlighted.</li> </ul> | <ul style="list-style-type: none"> <li>- Under-analysis.</li> </ul> | <p>element of this study is poorly reported compared to the quantitative element.</p> <p>However some of the themes reported from the qualitative interviews are not reported elsewhere e.g. recreational drug use as a coping strategy.</p> | <p>sample.</p> <ul style="list-style-type: none"> <li>- Diversity of participants.</li> <li>- Rich, extensive, detailed analysis.</li> <li>- Research reflexivity explicitly explored.</li> </ul> | <p>sample.</p> <ul style="list-style-type: none"> <li>- Diversity of participants.</li> <li>- Rich, extensive, detailed analysis.</li> </ul> | <ul style="list-style-type: none"> <li>- Under-analysis</li> <li>- Transferability</li> </ul> | <p>However important themes identified and implications for clinical practice considered.</p> |
|--|----------------------------------------------------------------------------------------------------------------------------------------------------------------------------------------------------------------------------------------------------------------------------|---------------------------------------------------------------------|----------------------------------------------------------------------------------------------------------------------------------------------------------------------------------------------------------------------------------------------|---------------------------------------------------------------------------------------------------------------------------------------------------------------------------------------------------|----------------------------------------------------------------------------------------------------------------------------------------------|-----------------------------------------------------------------------------------------------|-----------------------------------------------------------------------------------------------|

For peer review only

1  
2  
3  
4  
5  
6  
7  
8  
9  
10  
11  
12  
13  
14  
15  
16  
17  
18  
19  
20  
21  
22  
23  
24  
25  
26  
27  
28  
29  
30  
31  
32  
33  
34  
35  
36  
37  
38  
39  
40  
41  
42  
43  
44  
45  
46  
47  
48  
49  
50  
51  
52  
53  
54  
55  
56  
57  
58  
59  
60

1  
2  
3  
4  
5  
6  
7  
8  
9  
10  
11  
12  
13  
14  
15  
16  
17  
18  
19  
20  
21  
22  
23  
24  
25  
26  
27  
28  
29  
30  
31  
32  
33  
34  
35  
36  
37  
38  
39  
40  
41  
42  
43  
44  
45  
46  
47  
48  
49  
50  
51  
52  
53  
54  
55  
56  
57  
58  
59  
60

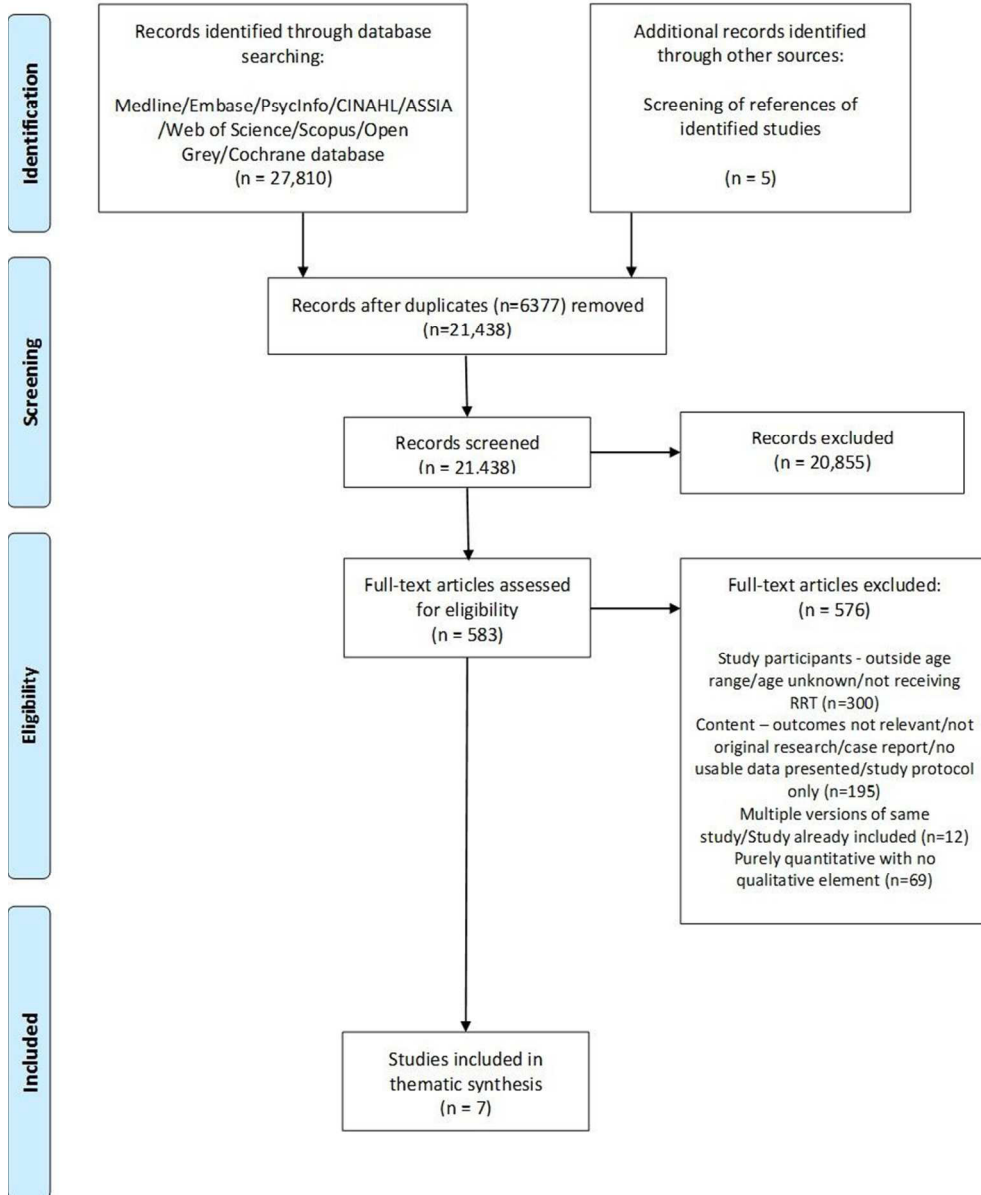

Figure 1. Systematic search results for studies

77x95mm (300 x 300 DPI)

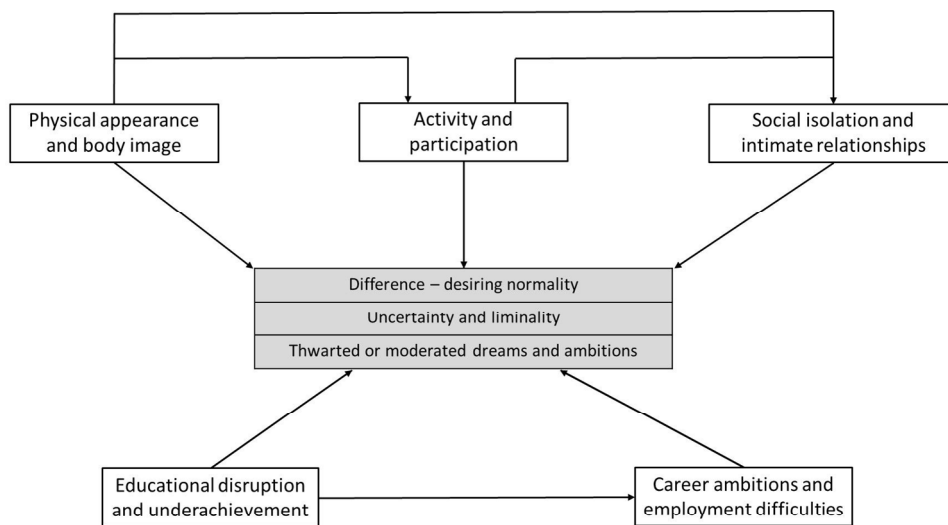

Figure 2. Thematic schema – illustrating central global and peripheral organising themes

Figure 2. Thematic schema

153x92mm (300 x 300 DPI)

|    |                                                                                                   |
|----|---------------------------------------------------------------------------------------------------|
| 1  |                                                                                                   |
| 2  |                                                                                                   |
| 3  | Supplementary material: Example search strategy                                                   |
| 4  |                                                                                                   |
| 5  |                                                                                                   |
| 6  | <u>Ovid® search</u>                                                                               |
| 7  |                                                                                                   |
| 8  |                                                                                                   |
| 9  |                                                                                                   |
| 10 | <u>Resources:</u>                                                                                 |
| 11 | Medline 1950 to present (16/11/17)                                                                |
| 12 | EMBASE 1974 to 2017 Nov 16                                                                        |
| 13 | PsycINFO 1806 to Nov Week 3 2017                                                                  |
| 14 |                                                                                                   |
| 15 |                                                                                                   |
| 16 | <u>Search terms</u>                                                                               |
| 17 | exp Renal Replacement Therapy/                                                                    |
| 18 | exp Renal Dialysis/                                                                               |
| 19 | exp Kidney Transplantation/                                                                       |
| 20 | h?emodialysis.tw.                                                                                 |
| 21 | peritoneal dialysis.tw.                                                                           |
| 22 | ((kidney\$ or renal) adj5 (transplant\$ or ?graft\$ or recipient\$ or replac\$ or artificial\$ or |
| 23 | extracorporeal\$)).tw.                                                                            |
| 24 | or/1-6                                                                                            |
| 25 | exp Adolescent/                                                                                   |
| 26 | exp Young Adult/                                                                                  |
| 27 | student\$.tw.                                                                                     |
| 28 | youth.tw.                                                                                         |
| 29 | adolescen\$.tw.                                                                                   |
| 30 | (young\$ adj2 (adult\$ or people or person\$)).tw.                                                |
| 31 | AYA.tw.                                                                                           |
| 32 | child\$.tw.                                                                                       |
| 33 | teen\$.tw.                                                                                        |
| 34 | p?ediatric\$.tw.                                                                                  |
| 35 | juvenile\$.tw.                                                                                    |
| 36 | pubescen\$.tw or puber\$.tw                                                                       |
| 37 | or/8-19                                                                                           |
| 38 | exp Socioeconomic factors/                                                                        |
| 39 | exp Educational status/                                                                           |
| 40 | exp Social class/                                                                                 |
| 41 | exp Mental health/                                                                                |
| 42 | exp Lifestyle/                                                                                    |
| 43 | demograph\$.tw.                                                                                   |
| 44 | socio?economic.tw.                                                                                |
| 45 | social adj (position or class or group or support).tw.                                            |
| 46 | socio?demographic.tw.                                                                             |
| 47 | education\$.tw. or school\$.tw. or college.tw. or universit\$.tw.                                 |
| 48 | household.tw. or family.tw. or home.tw. or domestic.tw.                                           |
| 49 | living adj3 standa*.tw                                                                            |
| 50 | independent living.tw. or independence.tw.                                                        |
| 51 |                                                                                                   |
| 52 |                                                                                                   |
| 53 |                                                                                                   |
| 54 |                                                                                                   |
| 55 |                                                                                                   |
| 56 |                                                                                                   |
| 57 |                                                                                                   |
| 58 |                                                                                                   |
| 59 |                                                                                                   |
| 60 |                                                                                                   |

|    |                                                                                          |
|----|------------------------------------------------------------------------------------------|
| 1  |                                                                                          |
| 2  |                                                                                          |
| 3  | relationship\$.tw. or marriage.tw. or ?friend\$.tw. or partner\$.tw. or spouse\$.tw.     |
| 4  | income.tw. or wage\$.tw. or earning\$.tw. or salar\$.tw. or pay\$.tw. or benefit\$.tw.   |
| 5  | employment.tw. or job.tw. or career.tw. or occupation.tw. or work.tw.                    |
| 6  | qualification\$.tw. or attainment.tw. or achievement\$.tw. or exam\$.tw. or degree\$.tw. |
| 7  | disabilit\$.tw.                                                                          |
| 8  | co?morbidity\$.tw.                                                                       |
| 9  | (daily adj3 activit\$).tw.                                                               |
| 10 | adl\$.tw.                                                                                |
| 11 | adherence.tw.                                                                            |
| 12 | compliance.tw.                                                                           |
| 13 | health adj (factors or status or issues).tw.                                             |
| 14 | wellbeing.tw.                                                                            |
| 15 | psycho?social.tw.                                                                        |
| 16 | (psychological or mental) adj (health or wellbeing).tw.                                  |
| 17 | anxiety.tw.                                                                              |
| 18 | depression.tw.                                                                           |
| 19 | body image.tw.                                                                           |
| 20 | stigma.tw.                                                                               |
| 21 | social support.tw.                                                                       |
| 22 | acceptance of illness.tw.                                                                |
| 23 | patient satisfaction.tw.                                                                 |
| 24 | locus of control.tw.                                                                     |
| 25 | personality.tw.                                                                          |
| 26 | patient activation.tw. or self?efficacy.tw                                               |
| 27 | quality of life.tw.                                                                      |
| 28 | ?qol.tw.                                                                                 |
| 29 | lifestyle.tw.                                                                            |
| 30 | smok\$.tw. or cigarette\$.tw. or tobacco.tw.                                             |
| 31 | drink\$.tw. or alcohol\$.tw.                                                             |
| 32 | gamb\$.tw. or betting.tw.                                                                |
| 33 | sex.tw.                                                                                  |
| 34 | drug\$.tw. or substance.tw. or addict.tw.                                                |
| 35 | crim\$.tw.                                                                               |
| 36 | or/21-66                                                                                 |
| 37 | 7 and 20 and 67                                                                          |
| 38 |                                                                                          |
| 39 |                                                                                          |
| 40 |                                                                                          |
| 41 |                                                                                          |
| 42 |                                                                                          |
| 43 |                                                                                          |
| 44 |                                                                                          |
| 45 |                                                                                          |
| 46 |                                                                                          |
| 47 |                                                                                          |
| 48 |                                                                                          |
| 49 |                                                                                          |
| 50 |                                                                                          |
| 51 |                                                                                          |
| 52 |                                                                                          |
| 53 |                                                                                          |
| 54 |                                                                                          |
| 55 |                                                                                          |
| 56 |                                                                                          |
| 57 |                                                                                          |
| 58 |                                                                                          |
| 59 |                                                                                          |
| 60 |                                                                                          |

## Enhancing transparency in reporting the synthesis of qualitative research: the ENTREQ statement

| No | Item                       | Guide and description                                                                                                                                                                                                                                                                                                                                                                                             | Reported on page # |
|----|----------------------------|-------------------------------------------------------------------------------------------------------------------------------------------------------------------------------------------------------------------------------------------------------------------------------------------------------------------------------------------------------------------------------------------------------------------|--------------------|
| 1  | Aim                        | State the research question the synthesis addresses.                                                                                                                                                                                                                                                                                                                                                              | 5                  |
| 2  | Synthesis methodology      | Identify the synthesis methodology or theoretical framework which underpins the synthesis, and describe the rationale for choice of methodology ( <i>e.g. meta-ethnography, thematic synthesis, critical interpretive synthesis, grounded theory synthesis, realist synthesis, meta-aggregation, meta-study, framework synthesis</i> ).                                                                           | 7                  |
| 3  | Approach to searching      | Indicate whether the search was pre-planned ( <i>comprehensive search strategies to seek all available studies</i> ) or iterative ( <i>to seek all available concepts until they theoretical saturation is achieved</i> ).                                                                                                                                                                                        | 6                  |
| 4  | Inclusion criteria         | Specify the inclusion/exclusion criteria ( <i>e.g. in terms of population, language, year limits, type of publication, study type</i> ).                                                                                                                                                                                                                                                                          | 6                  |
| 5  | Data sources               | Describe the information sources used ( <i>e.g. electronic databases (MEDLINE, EMBASE, CINAHL, psycINFO, Econlit), grey literature databases (digital thesis, policy reports), relevant organisational websites, experts, information specialists, generic web searches (Google Scholar) hand searching, reference lists</i> ) and when the searches conducted; provide the rationale for using the data sources. | 6 and 7            |
| 6  | Electronic Search strategy | Describe the literature search ( <i>e.g. provide electronic search strategies with population terms, clinical or health topic terms, experiential or social phenomena related terms, filters for qualitative research, and search limits</i> ).                                                                                                                                                                   | 6                  |
| 7  | Study screening methods    | Describe the process of study screening and sifting ( <i>e.g. title, abstract and full text review, number of independent reviewers who screened studies</i> ).                                                                                                                                                                                                                                                   | 6                  |

| No | Item                    | Guide and description                                                                                                                                                                                                                                                                                                                                                                             | Reported on page #          |
|----|-------------------------|---------------------------------------------------------------------------------------------------------------------------------------------------------------------------------------------------------------------------------------------------------------------------------------------------------------------------------------------------------------------------------------------------|-----------------------------|
| 8  | Study characteristics   | Present the characteristics of the included studies ( <i>e.g. year of publication, country, population, number of participants, data collection, methodology, analysis, research questions</i> ).                                                                                                                                                                                                 | 8 and Table 1               |
| 9  | Study selection results | Identify the number of studies screened and provide reasons for study exclusion ( <i>e.g. for comprehensive searching, provide numbers of studies screened and reasons for exclusion indicated in a figure/flowchart; for iterative searching describe reasons for study exclusion and inclusion based on modifications to the research question and/or contribution to theory development</i> ). | 8 and Figure 1              |
| 10 | Rationale for appraisal | Describe the rationale and approach used to appraise the included studies or selected findings ( <i>e.g. assessment of conduct (validity and robustness), assessment of reporting (transparency), assessment of content and utility of the findings</i> ).                                                                                                                                        | 7                           |
| 11 | Appraisal items         | State the tools, frameworks and criteria used to appraise the studies or selected findings ( <i>e.g. Existing tools: CASP, QARI, COREQ, Mays and Pope [25]; reviewer developed tools; describe the domains assessed: research team, study design, data analysis and interpretations, reporting</i> ).                                                                                             | 7                           |
| 12 | Appraisal process       | Indicate whether the appraisal was conducted independently by more than one reviewer and if consensus was required.                                                                                                                                                                                                                                                                               | 7                           |
| 13 | Appraisal results       | Present results of the quality assessment and indicate which articles, if any, were weighted/excluded based on the assessment and give the rationale.                                                                                                                                                                                                                                             | 8 and 9<br>Table 2, Table 3 |
| 14 | Data extraction         | Indicate which sections of the primary studies were analysed and how were the data extracted from the primary studies? ( <i>e.g. all text under the headings "results /conclusions" were extracted electronically and entered into a computer software</i> ).                                                                                                                                     | 7 and 8                     |
| 15 | Software                | State the computer software used, if any.                                                                                                                                                                                                                                                                                                                                                         | 7                           |



| No | Item                 | Guide and description                                                                                                                                                                                                                  | Reported on page # |
|----|----------------------|----------------------------------------------------------------------------------------------------------------------------------------------------------------------------------------------------------------------------------------|--------------------|
| 16 | Number of reviewers  | Identify who was involved in coding and analysis.                                                                                                                                                                                      | 8                  |
| 17 | Coding               | Describe the process for coding of data ( <i>e.g. line by line coding to search for concepts</i> ).                                                                                                                                    | 8                  |
| 18 | Study comparison     | Describe how were comparisons made within and across studies ( <i>e.g. subsequent studies were coded into pre-existing concepts, and new concepts were created when deemed necessary</i> ).                                            | 8                  |
| 19 | Derivation of themes | Explain whether the process of deriving the themes or constructs was inductive or deductive.                                                                                                                                           | 7 and 8            |
| 20 | Quotations           | Provide quotations from the primary studies to illustrate themes/constructs, and identify whether the quotations were participant quotations of the author's interpretation.                                                           | 10-16              |
| 21 | Synthesis output     | Present rich, compelling and useful results that go beyond a summary of the primary studies ( <i>e.g. new interpretation, models of evidence, conceptual models, analytical framework, development of a new theory or construct</i> ). | 9-17<br>Figure 2   |
