# Supplementary material for: Young adults’ perspectives on living with kidney failure: a systematic review and thematic synthesis of qualitative studies
Source: PubMed Central journal article supplement — BMJ Open. 2018 Jan 10;8(1):e019926. doi: 10.1136/bmjopen-2017-019926 (PMC5781019; doi:10.1136/bmjopen-2017-019926), 2018-01-10
Supplement: bmjopen-2017-019926supp001.pdf [file bmjopen-2017-019926supp001.pdf]

|                                                                                                                          |
|--------------------------------------------------------------------------------------------------------------------------|
| Supplementary material: Example search strategy                                                                          |
| <u>Ovid® search</u>                                                                                                      |
| <u>Resources:</u>                                                                                                        |
| Medline 1950 to present (16/11/17)                                                                                       |
| EMBASE 1974 to 2017 Nov 16                                                                                               |
| PsycINFO 1806 to Nov Week 3 2017                                                                                         |
| <u>Search terms</u>                                                                                                      |
| exp Renal Replacement Therapy/                                                                                           |
| exp Renal Dialysis/                                                                                                      |
| exp Kidney Transplantation/                                                                                              |
| h?emodialysis.tw.                                                                                                        |
| peritoneal dialysis.tw.                                                                                                  |
| ((kidney\$ or renal) adj5 (transplant\$ or ?graft\$ or recipient\$ or replac\$ or artificial\$ or extracorporeal\$)).tw. |
| or/1-6                                                                                                                   |
| exp Adolescent/                                                                                                          |
| exp Young Adult/                                                                                                         |
| student\$.tw.                                                                                                            |
| youth.tw.                                                                                                                |
| adolescen\$.tw.                                                                                                          |
| (young\$ adj2 (adult\$ or people or person\$)).tw.                                                                       |
| AYA.tw.                                                                                                                  |
| child\$.tw.                                                                                                              |
| teen\$.tw.                                                                                                               |
| p?ediatric\$.tw.                                                                                                         |
| juvenile\$.tw.                                                                                                           |
| pubescen\$.tw or puber\$.tw                                                                                              |
| or/8-19                                                                                                                  |
| exp Socioeconomic factors/                                                                                               |
| exp Educational status/                                                                                                  |
| exp Social class/                                                                                                        |
| exp Mental health/                                                                                                       |
| exp Lifestyle/                                                                                                           |
| demograph\$.tw.                                                                                                          |
| socio?economic.tw.                                                                                                       |
| social adj (position or class or group or support).tw.                                                                   |
| socio?demographic.tw.                                                                                                    |
| education\$.tw. or school\$.tw. or college.tw. or universit\$.tw.                                                        |
| household.tw. or family.tw. or home.tw. or domestic.tw.                                                                  |
| living adj3 standa*.tw                                                                                                   |
| independent living.tw. or independence.tw.                                                                               |

|                                                                                          |
|------------------------------------------------------------------------------------------|
| relationship\$.tw. or marriage.tw. or ?friend\$.tw. or partner\$.tw. or spouse\$.tw.     |
| income.tw. or wage\$.tw. or earning\$.tw. or salar\$.tw. or pay\$.tw. or benefit\$.tw.   |
| employment.tw. or job.tw. or career.tw. or occupation.tw. or work.tw.                    |
| qualification\$.tw. or attainment.tw. or achievement\$.tw. or exam\$.tw. or degree\$.tw. |
| disabilit\$.tw.                                                                          |
| co?morbidity\$.tw.                                                                       |
| (daily adj3 activit\$).tw.                                                               |
| adl\$.tw.                                                                                |
| adherence.tw.                                                                            |
| compliance.tw.                                                                           |
| health adj (factors or status or issues).tw.                                             |
| wellbeing.tw.                                                                            |
| psycho?social.tw.                                                                        |
| (psychological or mental) adj (health or wellbeing).tw.                                  |
| anxiety.tw.                                                                              |
| depression.tw.                                                                           |
| body image.tw.                                                                           |
| stigma.tw.                                                                               |
| social support.tw.                                                                       |
| acceptance of illness.tw.                                                                |
| patient satisfaction.tw.                                                                 |
| locus of control.tw.                                                                     |
| personality.tw.                                                                          |
| patient activation.tw. or self?efficacy.tw                                               |
| quality of life.tw.                                                                      |
| ?qol.tw.                                                                                 |
| lifestyle.tw.                                                                            |
| smok\$.tw. or cigarette\$.tw. or tobacco.tw.                                             |
| drink\$.tw. or alcohol\$.tw.                                                             |
| gamb\$.tw. or betting.tw.                                                                |
| sex.tw.                                                                                  |
| drug\$.tw. or substance.tw. or addict.tw.                                                |
| crim\$.tw.                                                                               |
| or/21-66                                                                                 |
| 7 and 20 and 67                                                                          |
